# **The Landscape Of Circular RNA Expression In The Human Brain**

Akira Gokoolparsadh<sup>1</sup>, Firoz Anwar<sup>1</sup>, Irina Voineagu<sup>1,\*</sup>

1. School of Biotechnology and Biomolecular Sciences, University of New South Wales,  
Sydney, Australia

\*Corresponding author:

Assoc. Prof. Irina Voineagu

School of Biotechnology and Biomolecular Sciences

University of New South Wales

Kensington, Sydney NSW 2052 Australia

Phone: +61 (02) 9385 2029

Email: [i.voineagu@unsw.edu.au](mailto:i.voineagu@unsw.edu.au)

## 14 **ABSTRACT**

15       Circular RNAs (circRNAs) are enriched in the mammalian brain and are upregulated in  
16 response to neuronal differentiation and depolarisation. These RNA molecules, formed by non-  
17 canonical back-splicing, have both regulatory and translational potential. Here, we carried out an  
18 extensive characterisation of circRNA expression in the human brain, in nearly two hundred human  
19 brain samples, from both healthy individuals and autism cases. We identify hundreds of novel  
20 circRNAs and demonstrate that circRNAs are not expressed stochastically, but rather as major  
21 isoforms. We characterise inter-individual variability of circRNA expression in the human brain  
22 and show that inter-individual variability is less pronounced than variability between cerebral  
23 cortex and cerebellum. We also find that circRNA expression is dynamic during cellular maturation  
24 in brain organoids, but remains largely stable across the adult lifespan. Finally, we identify a  
25 circRNA co-expression module upregulated in autism samples, thereby adding another layer of  
26 complexity to the transcriptome changes observed in autism brain. These data provide a  
27 comprehensive catalogue of circRNAs as well as a deeper insight into their expression in the  
28 human brain, and are available as a free resource in browsable format at:

29 [http://www.voineagulab.unsw.edu.au/circ\\_rna](http://www.voineagulab.unsw.edu.au/circ_rna)

30

## 31 **INTRODUCTION**

32       Circular RNAs (circRNAs) are an emerging class of RNAs formed by the non-sequential  
33 back-splicing of pre-messenger RNAs [1]. CircRNAs are expressed in a tissue-specific manner and  
34 in some cases are more efficiently generated than their linear cognate mRNAs [2, 3]. Although  
35 circRNAs are considered to be primarily non-coding molecules, a subset of circRNAs can be  
36 translated [4]. Due to their circular nature, circRNAs lack a 5' cap structure and a poly-A tail,  
37 which in turn renders them resistant to enzymatic degradation. Consequently, circRNAs are  
38 exceptionally stable.

39 Several studies have demonstrated that across a range of mammalian tissues, circRNA  
40 expression is most abundant in the brain, with an overall enrichment in the cerebellum [5-7].  
41 Similarly, in *Drosophila*, circRNA expression is enriched in the nervous system compared to other  
42 tissues [8]. In addition to tissue specificity, circRNAs also show dynamic expression during  
43 neuronal differentiation and depolarisation [6, 7, 9, 10], and are highly concentrated in  
44 synaptosomes [6], indicating that these molecules likely play a functional role in neurons.

45 The extent to which circRNAs influence the expression levels of their parental genes is yet to  
46 be elucidated, but at least two mechanisms are known to be at play: they can function as miRNA  
47 sponges [11, 12], and can increase the transcriptional efficiency of their parental genes [13]. The  
48 former mechanism is important for pluripotency and differentiation [14], as well as astrocyte  
49 activation [15]. Remarkably, the first study to investigate circRNA loss-of-function *in vivo* revealed  
50 that interactions between circRNAs and miRNAs are important for normal brain function [12].  
51 *Cdr1as* knock-out mice, which lack circRNA expression at the *Cdr1as* locus, display impaired  
52 sensory-motor gating and abnormal synaptic transmission. These phenotypes are associated with  
53 changes in miR-7 and miR-671 levels, and consequent transcriptional changes in immediate early  
54 gene expression.

55 Despite accumulating evidence for an important role of circRNAs in the brain, our current  
56 understanding of their expression in the human brain is limited by relatively low sample sizes of  
57 existing studies. The largest study to date included 12 ENCODE normal human brain samples,  
58 while several other studies have assessed circRNA expression in small cohorts with at most 10  
59 samples/group [5, 16-20]. A recent study combined data across multiple datasets, including a total  
60 of 21 human brain samples [21]; however, 19 of these samples were poly-A selected and thus  
61 circRNA detection was dependent on the inefficiency of the poly-A selection step. Therefore, a  
62 robust large-scale dataset of circRNA expression in the human brain is currently lacking.

63 Given the limited data on circRNA expression in the human brain, several questions remain  
64 open: (a) How does circRNA expression vary across individuals and human brain regions? (b)

65 Does circRNA expression change significantly in an age-dependent manner? (c) Given that the  
66 brain is characterised by extensive alternative splicing (AS), is the abundant circRNA expression  
67 observed in the brain primarily a reflection of the complexity of brain AS events?

68 Here, we begin to address these questions by investigating circRNA expression in nearly two  
69 hundred human brain samples, from three brain regions: frontal cortex, temporal cortex and  
70 cerebellum, from normal individuals and autism spectrum disorder (ASD) cases. We first assessed  
71 the global properties of circRNA expression in control samples, to gain novel insights into the  
72 expression of this class of RNA molecules in the human brain.

- 73 • We identify hundreds of novel circRNAs, some of which are expressed in over a hundred brain  
74 samples.
- 75 • We demonstrate for the first time that circRNA expression is characterized by major isoforms,  
76 rather than stochastic expression.
- 77 • By investigating the interplay between AS and circRNA expression, we demonstrate that  
78 circRNAs are formed primarily from exons with high inclusion rates, supporting the notion that  
79 they are not primarily a by-product of exon skipping in the brain.
- 80 • We find that circRNAs only mildly change in expression in the human brain across the adult life  
81 span.
- 82 • We also investigate the developmental aspect of circRNA expression by assessing for the first  
83 time circRNA expression in human brain organoids [22], and providing the first resource of  
84 circRNA expression in brain organoids.

85 CircRNA expression has been previously shown to be brain-region specific for a subset of  
86 circRNAs [6]. Here, due to the dataset sample size we are able for the first time to investigate the  
87 relationship between inter-individual variability and brain-region specific circRNA expression. We  
88 show that similarly to protein-coding gene expression, inter-individual variability of circRNA  
89 expression is less pronounced than variability between brain regions (cerebral cortex and  
90 cerebellum), a property that holds true for control as well as ASD samples.

91 By investigating circRNA expression in ASD brain for the first time, we provide another  
92 layer of complexity to our understanding of transcriptome changes in ASD. Using a co-expression  
93 network approach, we identify circRNAs with increased expression in cerebral cortex in ASD.

94 Overall, our data provides a rich resource of circRNA expression in the human brain, and  
95 brings further insight into the expression properties of this class of RNA molecules.

96

## 97 **RESULTS**

### 98 *Dataset Overview and Benchmarking*

99 We investigated circRNA expression in a total of 197 human brain samples [23] from frontal  
100 cortex, temporal cortex and cerebellum (Methods; Supplementary Table 1) obtained from control  
101 (CTL) and ASD individuals (Figure 1a). These paired-end unstranded RNA-seq data were  
102 generated following ribosomal RNA-depletion (Methods; [23]), which makes them suitable for  
103 circRNA detection, unlike other large-scale brain datasets, which include poly-A selection (e.g.  
104 GTEX data [24]). In order to assess the reproducibility of our findings, we divided these samples  
105 into a discovery dataset (DS1, 144 samples) and a replication dataset (DS2, 53 samples). To allow  
106 adequate statistical power, the discovery dataset DS1 was assigned a larger sample size than the  
107 replication dataset DS2, where we would test for effects already identified in DS1. Given the well  
108 documented transcriptional similarity between frontal and temporal cortex [25], which we also  
109 observed for circRNAs (see results section on inter-region variability), we considered these regions  
110 as a single group (cerebral cortex; CTX). Within each dataset, there was no significant difference in  
111 age or gender ratios between CTX and cerebellum (CB) samples, or between ASD and CTL  
112 samples (Supplementary Figure 1).

113 To assess the quality of the RNA-seq data and of the circRNA quantification approach, we  
114 first carried out a benchmarking analysis:

- 115 • For a subset of 5 brain tissue samples we generated two sets of benchmarking data: poly-A+  
116 RNA-seq (to assess false-positive rates of circRNA detection), and ribo-depleted stranded RNA-

117 seq (to assess the effect of strandedness on circRNA quantification). These benchmarking data  
118 were generated from the same individual and brain region as the original data [23].

119 • We quantified circRNA expression using two different algorithms: CIRCexplorer [26] and DCC  
120 [27]. Based on a recent independent comparison of the performance of existing circRNA-  
121 quantification methods [28], both CIRCexplorer and DCC had a low false-positive rate, were  
122 robust to background noise, and had good sensitivity of detecting true positives (i.e. RNaseR  
123 enriched circRNAs).

124 The false-positive detection rate (i.e. the percentage of circRNAs detected in DS1 data that  
125 were also detected in the polyA+ data from the same sample, normalized for sequencing depth) was  
126 < 1% for DCC and < 3% for CIRCexplorer (Methods; Supplementary Figure 2a). Notably, we  
127 observed low false-positive rates despite the fact that the sequencing depth and the paired-end read  
128 length were higher for the polyA+ libraries than the original RNA-seq data (Supplementary Figure  
129 2b). Since previously reported polyA+ based false positive rates were 2.7%-8% depending on  
130 algorithm [10], we concluded that both DCC and CIRCexplorer performed well on the brain dataset,  
131 with DCC showing a particularly low false-positive rate.

132 We also assessed the effect of strand-specificity of the RNA-seq data on false-positive rate  
133 detection. We found that all false-positive circRNAs detected in the unstranded data were detected  
134 in the stranded data as well (Supplementary Figure 2c), demonstrating that lack of strand-  
135 specificity did not lead to false-positive circRNA detection.

136 Across the five DS1 brain tissue samples, DCC and CIRCexplorer identified 5706 and 5426  
137 circRNAs, respectively (Methods), with 91% of these being identified by both algorithms.  
138 Furthermore, the correlation between circRNA expression quantified by DCC and CIRCexplorer in  
139 the same sample was between 0.97 and 0.99 (Supplementary Figure 2d). This result indicated that  
140 circRNA quantification was robust to the choice of method, and due to its lower false-positive  
141 detection rate, DCC was chosen for downstream analyses.

142 CircRNA quantification in all 197 samples (including control and ASD samples) lead to the  
143 detection of a total of 43,872 circRNAs in DS1 and 28,251 circRNAs in DS2 (Methods). Circular  
144 junction (i.e. back-splice) reads were normalised to total library size as counts per million (CPM).  
145 Given that the expression of circRNAs can be influenced by the expression level of the parental  
146 transcript, we also normalised circRNA expression to that of the parental transcript by calculating a  
147 circular-to-linear ratio (CLR), as well as a circularisation index (CI; Figure 1b).

148 CircRNAs were considered robustly expressed if they were detected by at least 2 circular  
149 junction reads per sample in a minimum of 5 distinct samples. We selected these filtering criteria  
150 based on assessment of reproducibility between DS1 and DS2 at a range of filtering criteria  
151 (Methods, Figure 1c and Supplementary Figure 2e). Since our purpose was to construct a resource  
152 of circRNAs reliably detectable in the human brain, we considered reproducibility between  
153 independent sets of samples to be an important criterion. Requiring circRNA detection by at least 2  
154 circular junction reads per sample in a minimum of 5 distinct samples maximised the  
155 reproducibility between DS1 and DS2 (90% overlap between datasets; Figure 2a).

156 The filtered datasets (DS1: 14,386 circRNAs, DS2: 9,440 circRNAs) were used for all  
157 downstream analyses.

158 We assessed the circular nature of a subset of 22 circRNAs by RT-PCR with divergent  
159 primers (which would amplify on a circular but not a linear molecule), and found a 90.9%  
160 validation rate (Methods; Figure 2b).

161 We also observed a strong correlation (Spearman  $r_{ho}=0.93$ ) between the mean circRNA  
162 expression level (CLR) in DS1 and DS2, supporting the robustness of these data.

163 The 14,386 DS1 circRNAs and 9,440 DS2 circRNAs (listed in Supplementary Table 2) were  
164 expressed from a total of 4,555 and 3,650 unique genes, respectively. Gene ontology enrichment  
165 analysis of circRNA producing genes, with correction for gene length (Methods), showed an over-  
166 representation of genes functioning at the synapse, particularly those involved in synapse vesicle

167 transport and localisation, but also genes involved in cell cycle G2/M phase transition, chromatin  
168 organisation and gene silencing (Figure 2c and Supplementary Table 3).

169 Previous data has shown that around 6% of the circRNAs detected in the human brain are  
170 also detected in mouse brain, with 28% of mouse circRNAs showing conserved expression in  
171 human [6]. We assessed the conservation rate of circRNA expression between human and mouse  
172 by using the liftOver tool [29] to obtain orthologous mouse coordinates of our circRNAs. The  
173 proportion of circRNAs for which the strict orthologous mouse coordinates were also detected as  
174 circRNAs was then assessed using mouse brain circRNA expression data from Rybak-Wolf et al.  
175 2015 [6] (Methods). We found a circRNA expression conservation of 8.6% in DS1 and 9.6% in  
176 DS2, consistent with previous observations [6].

177 Overall the circRNA data showed high reproducibility across the two datasets, high RT-PCR  
178 validation rates, and were consistent with previous data regarding human-to-mouse conservation  
179 and expected functional enrichment of circRNA-producing genes.

180

### 181 *Identification of novel circRNAs*

182 Given the much larger dataset employed in our study compared to existing human circRNA  
183 expression studies [6], which are curated in circBase [30], we expected to identify novel circRNAs  
184 despite our more stringent detection criteria (the higher stringency in our dataset comes from the  
185 fact we required detection of circRNAs in a minimum of 5 independent samples in each dataset,  
186 which had not been feasible with previous human brain sample sizes). Indeed, relative to circBase,  
187 we detected 1,548 novel circRNAs in DS1 and 692 in DS2, of which 83% were detected in both  
188 datasets (Methods; Figure 2a). Hundreds of novel circRNAs were detected in more than 10 brain  
189 samples, and some were expressed in more than a hundred samples, demonstrating that they are  
190 frequently expressed in the human brain (Figure 2d). CircRNA annotation relative to genomic  
191 features showed that most circRNAs, including novel circRNAs, were formed between annotated  
192 exon-exon junctions (Supplementary Figure 3).



193 The novel circRNAs identified included both novel isoforms from known circRNA-  
194 producing genes, as well as over a thousand circRNAs expressed from genes not previously  
195 reported to circularise (Supplementary Table 2). Throughout this manuscript, we use the term  
196 “circRNA isoforms” to refer to circRNAs produced by back-splicing of distinct exon-exon  
197 junctions of a gene.

198 Among the novel circRNA-producing genes, several are involved in psychiatric disorders  
199 including *MEF2C-AS1* (a susceptibility locus for Alzheimer’s disease [31]) and *BRINP2* (a locus  
200 strongly associated with schizophrenia [32, 33]). Our data adds another layer to the transcriptome  
201 complexity of these genes, with potential implications for their transcriptional regulation.

202 As an example of the insight into circRNA expression in the human brain provided by our  
203 study, we outline circRNA expression from *RIMS2*, a gene that encodes a presynaptic protein  
204 involved in regulating synaptic membrane exocytosis [34]. *RIMS2* shows conserved circRNA  
205 expression in human, mouse, and pig brain [6, 35], with 35 known isoforms of *circRIMS2* in  
206 human brain [30]. Here, we identify 15 *RIMS2* circRNA isoforms detected in the human brain in  
207 both DS1 and DS2, of which 7 are novel circRNAs (Figure 2e). Notably, 3 of the novel circRNAs  
208 are highly expressed in both datasets (> 0.1 CPM in at least 2 distinct samples), and 2 of the novel  
209 isoforms were expressed in more than 50 brain samples. In addition to the high complexity of  
210 *circRIMS2* isoform expression, we also find that *RIMS2* shows circRNA isoform switching  
211 between cerebral cortex and cerebellum (Figure 2e).

212

### 213 ***CircRNA expression is characterised by major isoform(s)***

214 To investigate the global properties of circRNA expression in the human brain, we first used  
215 the data from control samples (N=68 in DS1; N=29 in DS2). Previous studies have shown that  
216 circRNA expression generally does not follow the expression of the parental gene [2, 6, 36].  
217 Consistently, we found that circRNA expression levels did not correlate with that of the parental  
218 gene, whether the latter was measured as total gene-level expression, or as the expression of the

219 corresponding linear junction (Spearman  $\rho$ : 0.09 and 0.09 respectively for DS1; 0.08 and 0.06 for  
220 DS2; Supplementary Figure 4). This observation is generally interpreted to suggest that circRNA  
221 expression is regulated independently of their parental linear transcript expression. However, given  
222 that circRNAs are stable molecules, and thus are less susceptible to degradation than mRNAs [37,  
223 38], the correlation between circRNA and mRNA might be attenuated due to the different  
224 degradation rates.

225 To further investigate whether circRNAs show evidence of regulated expression in the human  
226 brain, we assessed the relative expression of circRNA isoforms for each circRNA-producing gene.

227 An important layer of regulation of mRNA expression consists of major isoform(s), which  
228 account for most of the transcriptional output of a gene in a given tissue of cell type. We thus asked  
229 whether circRNA isoforms are stochastically expressed, or show evidence of major isoform  
230 expression. The latter scenario would strongly indicate regulated circRNA expression, in a manner  
231 that is not confounded by the difference in circRNA vs. mRNA degradation rates (Figure 3).

232 We thus assessed the major circRNA isoform relative expression (i.e. the expression level of  
233 the most highly expressed circRNA relative to the total circRNA expression from a given gene;  
234 Figure 3b). We classified genes by the number of circRNAs expressed, and found that across a  
235 wide range of such classes, the major circRNA isoform accounts for the majority of circRNA  
236 output (Figure 3c). To test whether this simply reflects the linear major isoform expression, we  
237 carried out the same analysis using circular-to-linear ratios. Based on CLR data, we also found that  
238 the major circRNA isoform accounts for the majority of circRNA expression normalised to linear  
239 transcript expression (Figure 3d).

240 We then investigated whether major isoform expression is explained by sequence  
241 complementarity of flanking introns, i.e. does the major isoform tend to show the highest sequence  
242 complementarity? Reverse-complementary sequence matches (RCM) of flanking introns were  
243 calculated for all circRNAs using autoBLAST ([39]; Methods). We found that circRNA major  
244 isoforms were only marginally more likely than expected by chance to have the highest sequence

245 complementarity score. For example, among genes producing 2 circRNAs, the major isoform  
246 showed the highest RCM score in only 53% of cases, while for genes producing 3 circRNAs the  
247 major isoform showed the highest RCM score in 36% of cases (Supplementary Figure 5).

248 These data demonstrate for the first time that circRNAs are expressed predominantly as  
249 major isoforms and further support the notion that circRNA formation is a regulated process.

250

### 251 *Interplay between canonical- and back-splicing in the human brain*

252 To assess the interplay between alternative splicing (AS) and exon circularisation in the  
253 normal human brain, we characterised alternative splicing events in the larger dataset (DS1, control  
254 samples) using rMATS [40], and contrasting CTX and CB (Methods). Cassette exon (i.e. exon  
255 skipping) was the predominant AS event (72%), and thus we focused on the comparison of  
256 alternatively spliced cassette exons (referred to as “AS” from here on) and circRNA formation.

257 We found that the percentage of AS exons was significantly higher among circRNA-forming  
258 exons than among non-circ forming exons after correction for gene expression levels and intron  
259 length (Figure 4a).

260 To further investigate the relationship between alternative splicing and circularisation, we  
261 quantified exon inclusion level (i.e. the ratio between the inclusion and the skipping isoform of a  
262 given AS exon; Methods). When comparing exon inclusion levels between circ-exons and non-  
263 circ-exons that undergo alternative splicing, we found that circ-exons were formed primarily from  
264 exons with high inclusion rates (Figure 4b), indicating that circRNA formation is not primarily a  
265 by-product of exon skipping.

266 The number of circRNAs expressed per gene varied between one and sixty (DS1), and was  
267 highly correlated between DS1 and DS2 (Spearman  $\rho = 0.82$ ). Using circRNAs expressed in both  
268 DS1 and DS2, we found that 446 genes expressed more than 5 circRNAs. Given the observed  
269 association between circRNA expression and AS, we investigated whether these “circRNA hotspot  
270 genes” were also characterised by complex AS. We found a significant correlation between the

271 number of circRNAs expressed and the number of alternative splicing events detected per gene  
272 ( $\rho=0.32$ ,  $p < 2.2e-16$ ). The correlation remained significant after correction for the total number  
273 of exons per gene ( $\rho=0.14$ ,  $p < 2.2e-16$ ). Some of the major hotspot genes (Figure 4c), including  
274 *RIMS1* (a schizophrenia associated gene [33]) and *NRXN1* (involved in autism [41, 42]) were  
275 indeed characterised by extensive alternative splicing (Figure 4c). However, hotspots of circRNA  
276 expression were also observed for 22 genes showing no detectable AS event (Figure 4c).

277 Overall, our data suggests that AS often co-occurs with circRNA formation, yet the interplay  
278 between AS and circRNA formation is highly locus-specific.

279

280 ***Inter-individual variability of circRNA expression is less pronounced than inter-region***  
281 ***variability***

282 Transcriptome data from human brain tissue commonly shows that inter-individual variability  
283 of gene expression is less pronounced than the similarity within broad brain regions, such as  
284 cerebral cortex and cerebellum [25]. As a consequence, gene expression data commonly clusters by  
285 broad brain region, while cerebral cortex sub-regions, such as frontal and temporal cortex, are  
286 transcriptionally very similar and cluster together [25, 43].

287 To begin to understand the inter-individual variability of circRNA expression in the human  
288 brain, we first compared the relationship between mean expression and variance for canonical  
289 splice junctions and circRNAs (i.e. back-splice junctions) using the DS1 control samples (N=68).  
290 We observed a higher coefficient of variance [CV] for circRNA back-splice junctions compared to  
291 canonical splice junctions (mean CV: 3.6 and 3.08 respectively;  $p < 2.2e-16$ , Wilcoxon rank sum  
292 test; Supplementary Figure 6a). This difference is explained by the fact that while most splice  
293 junctions are detected in nearly all samples, circRNAs are often expressed in a small proportion of  
294 samples (Supplementary Figure 6b). This observation is consistent with (a) the fact that the  
295 efficiency of canonical splicing is higher than that of back-splicing, and consequently back-splicing

296 occurs less frequently [9] and (b) the well documented property of non-coding RNAs to be  
297 specifically rather than broadly expressed [44].

298 Since circRNA formation is a more rare event than the transcription of the parental transcript,  
299 we then investigated whether its frequency was consistent across the two datasets. We found high  
300 agreement between the proportion of samples in which a circRNA was detected in DS1 and DS2,  
301 as well as high correlation between CLRs in the two datasets (Figure 5a-b). These data indicate that  
302 although circRNA formation is rare, the frequency and expression level are intrinsic properties of  
303 circRNAs.

304 We also found that circRNA expression data clustered by brain region, even after  
305 normalisation of circRNA levels to the expression of the parental transcript (i.e. CLR), suggesting  
306 that similarly to mRNA expression, circRNA expression variability between individuals is less  
307 pronounced than region-specific differences (CTX and CB, Figure 6a). Within CTX, frontal and  
308 temporal cortex samples clustered together, as commonly observed for gene expression data. ASD  
309 samples did not show distinct clustering based on CLR, rather followed the overall pattern of  
310 clustering based on brain CTX and CB region (Figure 6a).

311

### 312 ***CircRNA expression differences between CTX and CB***

313 One of the important properties of human brain regions is their cellular composition and layer  
314 structure, which in turn can affect the cellular composition of dissected brain samples. Therefore,  
315 we estimated *in-silico* the proportion of individual cell types in the brain tissue samples, using  
316 DeconRNAseq [45] (Methods), and gene expression data from pure populations of immunopanned  
317 neurons, astrocytes, oligodendrocytes, microglia and endothelial cells [46] as reference  
318 transcriptomes. We found a significant difference in the proportion of neurons between CB and  
319 CTX (Supplementary Figure 7a), with lower and more homogeneous neuronal proportions in the  
320 CB samples. We also found that the first principle components of both gene expression and  
321 circRNA expression data strongly correlated with the estimated proportion of neurons ( $|rho| > 0.8$

322 for gene expression PC1;  $|\rho| > 0.6$  for circRNA expression PC1; Supplementary Figure 7b-c),  
323 indicating that cellular composition is an important covariate when assessing gene and circRNA  
324 expression differences between brain regions. Thus we assessed circRNA expression differences  
325 between control CTX and CB samples using a linear model that included the estimated neuronal  
326 proportions as a covariate, in addition to age, sex, brain bank, RNA integrity number (RIN), and  
327 sequencing batch (Methods). We identified 501 circRNAs for which expression normalised to the  
328 linear transcript (i.e. CI) was significantly different between CTX and CB (FDR < 0.05; Methods).  
329 266 of the 501 circRNAs were replicated as significant in DS2 (FDR < 0.05; Methods), with high  
330 agreement of directionality (Figure 6b). Interestingly, 97% of these region-specific circRNAs  
331 showed higher circularisation rate in CB, suggesting the existence of trans-factors that favour  
332 circRNA formation in CB.

333 We also investigated how circRNA expression varies with age in cerebral cortex and  
334 cerebellum from control individuals. We found that the total number of circRNAs expressed  
335 showed an increasing trend with age in both brain regions, which was borderline-significant using a  
336 linear model with correction for covariates ( $p = 0.047$ ; DS1 data; Figure 6c). This observation was  
337 not statistically significant in DS2, likely due to the lower sample size ( $p > 0.05$ ). In addition, we  
338 assessed how individual circRNAs change in expression across the life span, using both a linear  
339 model and spline regression with inflexion points at 0, 10, 20 and 40 years. We did not identify any  
340 circRNAs that significantly changed in expression with age, after correction for co-variables and  
341 multiple testing (Methods). This is in contrast with gene expression changes with age, where as  
342 expected we identified over 500 genes significantly changing in expression across the life-span,  
343 most of which changed in the early developmental period (0-10 years), consistent with previous  
344 data [47, 48]. Our data indicate that the variation of circRNA expression with age is less  
345 pronounced than that of gene expression, with a mild increasing trend across the life span.

346 ***Cell-type specific and developmental variation of circRNA expression***

347 We next investigated circRNA expression in individual brain cell types by generating ribo-  
348 depleted RNA-seq data from cultured human primary astrocytes as well as *in-vitro* differentiated  
349 neurons (2-weeks differentiation; Methods). We found a much higher number of circRNAs  
350 expressed in neurons than in astrocytes: 3,601 in neurons vs. 93 in astrocytes, of which 74 were  
351 present in both cell types (Methods).

352 To investigate if this large difference in the number of circRNAs expressed in neurons and  
353 astrocytes is replicable, and to further investigate circRNA expression during cellular maturation,  
354 we mined RNA-seq data from human brain organoids immunopanned using either neuronal or  
355 astrocyte markers at various time points of organoid development (0-495 days) [22]. We observed  
356 variable numbers of circRNAs expressed ( $\geq 0.1$  CPM) at early maturation time points (0-150 days),  
357 followed by a progressive decrease in the number of circRNAs expressed in mature neurons and  
358 astrocytes ( $>150$  days; Figure 7a,  $p= 0.003$ , linear model t-statistic). Mature neurons indeed  
359 expressed higher number of circRNAs than mature astrocytes: 420 circRNAs were expressed in  
360 mature neurons vs. 318 in mature astrocytes (at a minimum of 0.1 CPM, in at least two mature cell  
361 samples, i.e.  $>150$  days of maturation). However, the difference was less pronounced than what we  
362 had observed between neurons differentiated for 2 weeks and cultured astrocytes. This observation  
363 is consistent with our data showing a progressive decrease in the number of circRNAs with cellular  
364 maturation.

365

366 ***Predicting trans-factors involved in circRNA formation in the human brain.***

367 Although the formation of circRNAs is strongly influenced by *cis*-factors, in particular the  
368 presence of repeats in the flanking introns [26, 49, 50], such factors cannot explain circRNA  
369 expression differences between cell types or brain regions. Among *trans*-factors, Quaking (QKI)  
370 has been identified as a regulator of circRNA formation during epithelial-to-mesenchymal  
371 transition [51], while Muscleblind (MBNL) has been shown to regulate circRNA formation from

372 its parental gene in *Drosophila* [36]. We hypothesized that additional RNA-binding proteins may  
373 play similar roles in the human brain. We thus carried out an enrichment analysis of circRNA-  
374 flanking regions for RNA binding protein (RBP) consensus binding sites, using MEME-ChIP [52]  
375 and a 100 bp window around each circRNA end (Methods). This enrichment analysis was carried  
376 out for astrocyte-specific circRNAs and neuron-specific circRNAs, defined as circRNAs detected  
377 in one cell type by the above criteria, but not the other. QKI served as a positive control, since it  
378 was four-fold higher in expression in organoid-derived mature astrocytes vs. neurons, and it is  
379 known as a potent regulator of circRNA formation during epithelial-to-mesenchymal transition [51].  
380 Indeed, QKI binding sites were enriched in the set of astrocyte-specific circRNAs (Supplementary  
381 Table 4), confirming the validity of our approach. In addition, astrocyte-specific circRNAs also  
382 showed enrichment for PCBP1 binding sites. Remarkably, the top enriched RBP binding sites for  
383 neuron-specific circRNAs were PCBP1 and QKI sites (Figure 7b). The enrichment of neuronal-  
384 specific circRNAs for QKI binding sites suggests that despite its lower expression levels in neurons,  
385 QKI also plays an important role in circRNA formation in these cells, acting upon neuron-specific  
386 transcripts. Our data also suggests that PCBP1, which is expressed in both cell types, may play a  
387 similarly important role in circRNA formation in both neurons and astrocytes. Three other RBPs  
388 showed binding site enrichment only for neuron-specific circRNAs: SRSF1, SRSF10 and PABPC4  
389 (Supplementary Table 4), indicating that these RBPs may play a role in circRNA formation  
390 specifically in neurons.

391

### 392 ***Co-expression networks identify circRNA expression differences in cerebral cortex in ASD***

393 Previous studies [23, 43] identified gene expression differences between ASD and controls in  
394 cerebral cortex. Given the heterogeneity of ASD and the often subtle gene expression changes,  
395 advanced methods such as co-expression analyses were required to uncover gene expression  
396 changes in ASD [23, 43]. Therefore we carried out a co-expression network analysis of circRNA  
397 expression (DS1 data, CPM) using the cortex samples, after regressing out all covariates except



398 phenotype (Methods). To address the problem of sparse data (i.e. most circRNAs being expressed  
399 in a small number of samples) we (a) used a similarity measure robust to outliers (biweight  
400 midcorrelation [53]), and (b) only included in the network analyses circRNAs expressed in at least  
401 a half of the 92 CTX samples (1,280 circRNAs). We identified 5 co-expression modules, of which  
402 one module (M4) showed significant eigengene differences between ASD and controls, with higher  
403 levels in ASD ( $p=0.006$ , Wilcoxon rank-sum test, Bonferroni corrected; Figure 8a; Methods). M4  
404 contained 98 circRNAs (Supplementary Table 5). Interestingly, the hub of this co-expression  
405 module is a circRNA expressed from *ZKSCAN1*, which plays a role in cell proliferation and  
406 migration in hepatic cells but its role has not yet been investigated in the brain (Figure 8b). M4 also  
407 included *circHIPK3*, a circRNA implicated in cell proliferation and migration through a miRNA  
408 sponge mechanism (Figure 8b) [54, 55]. Consistent with previous data on gene expression [23], we  
409 did not identify any ASD-associated circRNA co-expression module in the cerebellum.

410

## 411 **DISCUSSION**

412 The data presented here represents the first large-scale assessment of circRNA expression in  
413 the human brain, bringing further insight into an additional layer of brain transcriptome complexity.

414 The circRNAs included in our resource were detected in a minimum of 5 samples in DS1 and  
415 5 samples in DS2, with >90% reproducibility of detection between the two datasets, therefore  
416 representing a set of circRNAs reliably detected in the human brain. We focussed on identifying  
417 circRNAs reproducibly expressed, rather than cataloguing very rare back-splicing events.

418 CircRNAs, similarly to lncRNAs, were expressed in a very specific manner, and thus  
419 observed only in a subset of samples. Despite the fact that the expression of most circRNAs was  
420 restricted to a subset of samples, we observed a remarkably high correlation between DS1 and DS2  
421 circRNA expression levels, suggesting that the circularization rate is an intrinsic property of a  
422 given back-splice junction. To facilitate further mining of this rich resource for a wide range of  
423 biological questions, for each circRNA we provide information on the number of samples it was

424 detected in, as well as the mean expression level in each brain region of DS1 and DS2  
425 (Supplementary Table 2). CircRNA expression values normalized to sequencing depth for all DS1  
426 and DS2 circRNAs are provided in Supplementary Table 2 and can be accessed as a genome  
427 browser track at: [http://www.voineagulab.unsw.edu.au/circ\\_rna](http://www.voineagulab.unsw.edu.au/circ_rna). We also provide the first resource  
428 of circRNA expression in human brain organoid cultures (Supplementary Table 6).

429 The analysis of this rich resource revealed several novel insights into circRNA expression in  
430 the human brain. We found that circRNA expression is characterised by major isoforms, adding a  
431 novel aspect to the notion that circRNA expression is regulated in the human brain. As more data  
432 on circRNA expression in other tissues becomes available, it will be interesting to determine  
433 whether the major isoform circRNA expression is tissue-specific, as it is often the case for mRNAs,  
434 and how this relates to the tissue specificity of alternative splicing isoforms.

435 We observed a significant association between AS events and circRNA expression, which is  
436 consistent with previous data from human fibroblasts [49]. The number of AS events per gene  
437 explained ~10% of the variance in the number of circRNAs produced. This indicates that AS is a  
438 relevant factor in circRNA biogenesis in the brain, but despite the complexity of AS in the brain, it  
439 only partially accounts for circRNA formation. We also found that some of the circRNA hotspot  
440 genes, expressing more than five circRNA isoforms, did not show evidence of AS. These data  
441 suggest that the interplay between circRNA formation and AS is locus-specific, in agreement with  
442 the notion that *cis*-factors, such as the presence of complementary repeat sequences, play an  
443 important role in circRNA formation [26, 49, 50]. CircRNAs can be themselves alternatively-  
444 spliced, and while we don't address this aspect (it would require higher read length and sequencing  
445 depth [56]), an interesting future avenue is to investigate whether the complexity of circRNA AS in  
446 the human brain parallels that of linear RNAs.

447 The circRNA expression conservation rate between human and mouse determined in our  
448 study was consistent with that reported previously (Rybak-Wolf et al. 2015, [6]), at 8-9%. This  
449 estimate is very conservative since we (as well as Rybak-Wolf et al. 2015) required precise

450 matching of human and mouse back-splice junction coordinates. The conservation of circRNA  
451 expression from mouse to human using the same approach is much higher, close to 30% [6],  
452 indicative of higher complexity of circRNA expression in the human brain.

453 The analysis of circRNA expression changes with age showed a mild increase in the total  
454 number of circRNAs expressed across the life-span (0 to 60 years; DS1). Unlike gene expression,  
455 which shows major changes in the early postnatal period, followed by a plateau after 20 years of  
456 age [47], circRNAs showed a mild increasing trend throughout the life span. Previous studies have  
457 reported that circRNAs accumulate with age in mouse and *drosophila* brain [8, 57]. The  
458 comparison of 1 month and 22 month-old mice identified more up-regulated than down-regulated  
459 circRNAs in CTX and hippocampus, at  $p < 0.05$  using a *t*-test without correction for multiple testing  
460 [57]. Given the weak statistical significance and the fact that down-regulation might be more  
461 difficult to detect for these already lowly expressed molecules, further data would be required to  
462 determine whether circRNA expression changes with age in a similar manner in mouse and human  
463 brain. In *Drosophila* CNS, the total number of circRNAs detected increases with age, while  
464 individual circRNAs only passed a permissive statistical threshold ( $p < 0.05$ , without multiple  
465 testing correction) [8]. Taken together, the, available data across species support the notion of a  
466 progressive increase in circRNA levels with age in the brain, but this effect appears to be of a low  
467 magnitude, and therefore challenging to detect at genome-wide significance.

468 In contrast to age-dependent changes, circRNA expression differences between CTX and CB  
469 were pronounced, overriding inter-individual variability. We identified over two hundred circRNAs  
470 differentially expressed between CTX and CB, in both DS1 and DS2 and after correction for  
471 cellular composition. We also found that more than 90% of differentially expressed circRNAs  
472 showed higher expression in CB. This is in agreement with a previous observation based on two  
473 frontal cortex and two cerebellum replicates [6], showing overall higher circRNA expression in the  
474 cerebellum. The initial observation was interpreted as a reflection of higher proportion of neurons

475 in cerebellum than in cerebral cortex, a known property of this brain region. Here we demonstrate  
476 that the enrichment of circRNAs in the cerebellum is independent of cell-type composition.

477 In human brain organoids, the number of circRNAs expressed showed a progressive decrease  
478 with cellular maturation in both neurons and astrocytes. Despite the documented increase in  
479 circRNA expression during early neuronal differentiation [6, 7, 9, 10], we found that neuronal  
480 maturation beyond 150 days in organoid culture leads to an overall decrease in circRNA expression.  
481 Using data from neuronal and glial cells at the same maturation stage we found an enrichment of  
482 astrocyte-specific circRNAs for QKI binding sites, consistent with its known role in circRNA  
483 formation. We also uncovered PCBP1 as a novel candidate for circRNA expression regulation in  
484 astrocytes and neurons, and SRSF1, SRSF10 and PABPC4 as potential regulators of circRNAs in  
485 neurons, thereby highlighting these proteins as valuable candidates for further functional studies.

486 Finally, using a co-expression network approach we identified a circRNA co-expression  
487 module showing increased expression in ASD, the first identification of circRNA expression  
488 changes in this disorder.

489 Taken together our data is the first to provide information on circRNAs detected in human  
490 brain across multiple individuals. It represents a rich resource on circRNA expression in the human  
491 brain, available in a browsable format at [http://www.voineagulab.unsw.edu.au/circ\\_rna](http://www.voineagulab.unsw.edu.au/circ_rna)

492

## 493 **METHODS**

### 494 **RNA samples and RNA-seq data**

495 The RNA-seq data published by Parikshak et al. [23] (ribo-depleted, unstranded, 50 bp  
496 paired-end), was kindly provided by Prof. Daniel Geschwind before publication. Frontal cortex  
497 samples had been obtained from Brodmann area (BA) 9, temporal cortex samples from BA 41/42  
498 and 22, and cerebellar samples had been obtained from cerebellar vermis. We only included  
499 samples with RIN > 5 (Supplementary Table 1).

500 The distribution of samples between the two datasets (DS1 and DS2) is listed in  
501 Supplementary Table 1, and was based on the order in which we obtained the data. This in turn was  
502 based on the order in which RNA-seq data was generated, which was randomised across groups  
503 (Figure 1a).

504 RNA-seq data for benchmarking circRNA detection was generated for 5 DS1 tissue samples:  
505 5115\_ba9, 5278\_ba9, 5297\_ba41-42, 5308\_ba41-42, 5309\_ba41-42. Brain tissue from the same  
506 individuals and brain region had been obtained by our lab from the NICHD brain and tissue bank.  
507 Total RNA was extracted from ~ 100 mg of brain tissue using a Qiagen miRNeasy kit according to  
508 the manufacturer's protocol, and treated with 1 µl DNase I (Thermo Fisher Scientific, #AM2238)  
509 per 10 µg of RNA. Each RNA sample was divided in two, for library preparation with either the  
510 TruSeq Stranded Total RNA Ribozero kit or the TruSeq Stranded mRNA kit (which includes  
511 polyA selection). Library preparation was carried out at the UNSW Ramaciotti Centre for  
512 Genomics, followed by sequencing on an Illumina NextSeq 500 sequencer to obtain 100 bp paired-  
513 end reads (Supplementary Table 1).

514 For generating RNA-seq data from astrocytes and neurons, total RNA was extracted from  
515 human primary astrocytes and from neurons derived from human fetal neural progenitors.

516 Human primary astrocytes (Lonza, #CC-2565) stably expressing GFP from pCMV6-AC-GFP  
517 had been generated by selection with G418 (Thermo Fisher Scientific, #10231027) at 800µg/ml.  
518 Cells were cultured in RPMI GlutaMAX™ (Thermo Fisher Scientific, #35050061) supplemented  
519 with 10% foetal bovine serum, 1% streptomycin (10,000 µg/ml), 1% penicillin (10,000 units/ml)  
520 and 1% Fungizone (2.5 µg/ml) and seeded into 6-well tissue culture plates at a density of  $0.5 \times 10^6$   
521 cells 24 hours prior to RNA extraction. Total RNA was extracted using TRIzol® reagent and a  
522 Qiagen miRNeasy kit and treated with 1 µl DNase I (Thermo Fisher Scientific, #AM2238) per 10  
523 µg of RNA.

524 Neuronal differentiation of human neural progenitors stably transfected with pLRC-GFP was  
525 carried out for 2 weeks as previously described [58]. RNA extraction was carried out using a  
526 Qiagen miRNeasy kit, with on-column DNase digestion [58].

527 RNA samples from astrocytes (n=1), neurons (n=1) were depleted of ribosomal RNA using  
528 the Epicentre Ribo-zero kit, according to the manufacturer's protocol. Library preparation using the  
529 Illumina TruSeq Stranded kit  
530 ([http://www.illumina.com/products/truseq\\_stranded\\_total\\_rna\\_library\\_prep\\_kit.html](http://www.illumina.com/products/truseq_stranded_total_rna_library_prep_kit.html)) and  
531 sequencing on a NextSeq 500 Illumina sequencer were carried out at the UNSW Ramaciotti Centre  
532 for Genomics, generating 75 bp paired-end reads (Supplementary Table 1).

533 The RNA-seq data from human brain organoids was downloaded from SRA, accession  
534 number GSE99951.

### 535 **CircRNA benchmarking analysis**

536 For five brain tissue samples (5115\_ba9, 5278\_ba9, 5297\_ba41-42, 5308\_ba41-42,  
537 5309\_ba41-42), the polyA+ and ribo-depleted stranded data generated in the present study, as well  
538 as the ribo-depleted unstranded data from Parikshak et al. were mapped to the human genome  
539 (hg19) using STAR [59], and the chimeric read alignments were used as input for either DCC [27]  
540 or CIRCexplorer [26], run with default parameters. CircRNAs were filtered to include those  
541 detected by at least 2 back-spliced junction reads in a minimum of 2 distinct samples. CircRNA  
542 counts were normalised to library size to obtain counts-per-million (CPM).

### 543 **Human brain circRNA dataset**

544 RNA sequencing reads from DS1 and DS2 brain samples were aligned to the human genome  
545 (hg19) using STAR [59] as described above. Gene-level expression was assessed with  
546 *featureCounts*, as implemented in STAR. Samples with more than 3 standard deviations away from  
547 the mean of mean inter-sample correlations, as well as outliers on PCA analysis were eliminated  
548 from further analyses. For each dataset (DS1 and DS2), genes were filtered for expression at a  
549 minimum of 1 RPKM in at least 30% of the smallest sample group within each dataset (i.e. 6

550 samples in DS1 and 4 samples in DS2). CircRNAs were identified using STAR's chimeric read  
551 alignments as input for DCC [27], with default parameters for paired-end un-stranded data. Counts  
552 for circRNAs with identical genomic coordinates on opposite strands were summed, given the  
553 unstranded nature of the data. CircRNA counts were normalised to the total number of uniquely  
554 aligned reads, to obtain counts per million (CPM). For each circRNA, its corresponding linear  
555 junction counts were quantified using splice junction counts generated by STAR. The downstream  
556 and upstream linear junction counts were calculated as the sum of all linear junction reads spanning  
557 the start- and the end- circRNA coordinate respectively (schematic representation below). Linear  
558 junction reads were also normalised to library size (i.e. the total number of uniquely aligned reads).  
559

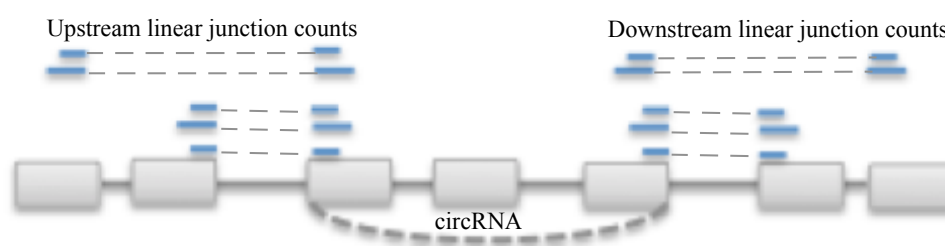

560

561

562 • *CircRNA annotation relative to genomic features*

563 Since the RNA-seq data was un-stranded, circRNAs were assigned a strand based on their  
564 overlap with exon junctions as follows: if either the start or the end overlapped an annotated exon  
565 junction, the circRNA was assigned the strand of the corresponding transcript. If neither start nor  
566 end overlapped an exon junction, or if they overlapped exon junctions on both strands, the strand  
567 was set as ambiguous. CircRNAs left with ambiguous strand annotation were next overlapped with  
568 gene intervals and assigned a strand in the same manner as above. CircRNA genomic annotation  
569 was done separately for the start and end coordinates with the following hierarchy: exon  
570 junction>exonic>intronic>genic (Supplementary Figure 3). CircRNAs were annotated relative to  
571 circBase downloaded 09.2017. All genomic annotations were performed relative to Ensembl  
572 GRCh37 transcript annotations downloaded 10.2014.

573 • *CircRNA filtering*

574 To select robustly expressed circRNAs we used the overlap between DS1 and DS2 as a guide  
575 for filtering criteria. We assessed the overlap between circRNAs detected in DS1 and DS2 when  
576 requiring circRNAs to be expressed at a minimum of either 2 read counts (a permissive criterion)  
577 or 0.1 CPM (stringent criterion) in a range of numbers of samples from 1 to 10 (Supplementary  
578 Figure 2e). We found that the overlap between DS1 and DS2 increased with the number of samples  
579 we required expression in, as expected, and plateaued at 5 samples. Notably, when requiring  
580 expression in a minimum of 5 samples, the overlap between DS1 and DS2 was above 90% using  
581 either the permissive or the stringent criteria, and thus we used this filtering parameter for inclusion  
582 of circRNAs in further analyses. However, we also include in the supplementary information  
583 (Supplementary Table 2) the number of samples in which each circRNAs is expressed at a higher  
584 expression threshold ( $\geq 0.1$  CPM), to allow this resource to be easily used to identify highly  
585 expressed circRNAs.

586 **Gene ontology enrichment analyses of circRNA-producing genes**

587 GO enrichment analysis was carried out using the intersection of circRNA producing genes  
588 from DS1 and DS2, and the intersection of all genes expressed in DS1 and DS2 as background. The  
589 enrichment analysis was done using GOrseq [60], with correction for gene length and Benjamini  
590 and Hochberg (BH) correction for multiple testing.

591 **Conservation of circRNA expression**

592 To assess circRNA expression conservation between human and mouse brain, we first  
593 converted hg19 human genomic coordinates to mm9 mouse coordinates using the liftOver tool  
594 from the UCSC genome browser. The converted coordinates were then interrogated using the  
595 mouse circRNA expression data from Rybak Wolf et al. [6] (Supplementary Table S1 of that study).  
596 The % conservation was calculated as the percentage of human circRNAs in DS1 and DS2  
597 respectively, for which their converted genomic coordinates were found as circRNAs expressed in  
598 the mouse brain.



## 599 **CircRNA flanking-intron sequence complementarity analysis**

600 Introns flanking circRNA back-splice junctions were used as input for autoBLAST [39],  
601 which employs BLAST with the following settings: parameters: blastn, word size 7, output format  
602 5, to determine sequence complementarity in circRNA flanking introns. Intron-pairing score for a  
603 given circRNA was defined as the number of reverse-complementary matches with a minimum bit  
604 score of 20.

## 605 **Alternative splicing analysis**

606 rMATS [40] was run with default parameters for 50 bp paired-end reads on DS1 samples  
607 contrasting CTX (Sample 1) and CB (Sample 2), and identified 145,995 cassette exons.  
608 Alternatively spliced exons were then filtered within each brain region, to include those supported  
609 by at least 2 inclusion junction reads and 2 skipping junction reads in two independent samples,  
610 leading to 33,207 AS exons in CTX and 24,380 AS exons in CB. These data are consistent with  
611 recent alternative splicing analyses in the human brain: Takata et al. 2017 identified 29,271  
612 alternatively spliced exons using RNA-seq data from the Common Mind consortium (206 human  
613 dorsolateral-prefrontal cortex samples) [61].

614 All comparisons between circRNA expression and AS were carried out in control samples.

## 615 ***In-silico* deconvolution**

616 To estimate *in-silico* the proportion of individual cell types in brain tissue samples, we used  
617 DeconRNAseq, which is specifically designed for RNA-seq data [45], and two distinct reference  
618 transcriptome datasets: (a) CAGE data from cultured neurons and astrocytes from the FANTOM5  
619 consortium [62], and (b) RNA-seq data from immunopanned human astrocytes and neurons from  
620 the Barres lab (Zhang et al., 2016 [46]). We found a very high correlation between the neuronal  
621 proportion estimates based on the two reference transcriptomes (Spearman  $\rho > 0.9$ ,  
622 Supplementary Figure 8a). We also found high correlation between neuronal proportion estimates  
623 obtained by FANTOM5 or Zhang et al., 2016 reference transcriptomes and the expression level of  
624 neuronal-specific genes (*MAP2*, *RBFOX1*, Supplementary Figure 8b). Given the highly similar

625 results obtained with neuronal proportion estimates based on the two reference transcriptome  
626 datasets, we used the cell-type reference transcriptome data from Zhang et al., 2016 in all  
627 downstream analyses. However, to show that the significant changes in circRNA expression  
628 between brain regions is robust to the neuronal proportion estimates, we also report the differential  
629 expression results obtained with FANTOM5 reference-based estimates in Supplementary Table 7.

### 630 **Differential expression with brain region and age**

631 To assess differential circRNA expression with brain region and age, we applied a linear  
632 model to circRNA expression levels normalised to their linear transcript (CI), using the control  
633 samples (DS1). Only circRNAs expressed in at least half of the samples were included in the  
634 analysis. Data was log<sub>2</sub>-transformed with an offset of 0.5. The following variables were included in  
635 the model: proportion of neurons, sex, RNA integrity number, sequencing batch, brain bank, age  
636 and brain region (CTX and CB). The same linear model was applied to gene-level expression data  
637 (RPKM). P-values for the linear model, obtained using the *summary* function in R, were corrected  
638 for multiple testing using a BH correction as implemented in the *multtest* Bioconductor package  
639 (<https://www.bioconductor.org/packages/release/bioc/html/multtest.html>). We did not identify any  
640 circRNAs differentially expressed with age (adjusted  $p < 0.05$ ). We also assessed circRNA  
641 expression changes with age using spline regression, with knots at 0, 10, 20, and 40 years old, and  
642 degree=1, using the basic spline (*bs*) function in the *splines* R package ([https://cran.r-](https://cran.r-project.org/web/packages/splines/index.html)  
643 [project.org/web/packages/splines/index.html](https://cran.r-project.org/web/packages/splines/index.html)), with the same result. The result remained the same,  
644 whether or not we included the proportion of neurons in the model.

645 501 circRNAs were differentially expressed between brain regions in DS1. To assess whether  
646 this result is replicable in the smaller dataset (DS2), we applied the same data analysis approach as  
647 above in DS2. We included both ASD and control DS2 samples, in order to increase statistical  
648 power, and added phenotype to the list of co-variates. 266 circRNAs were replicated in DS2 and  
649 are listed in Supplementary Table 7.

## 650 **Co-expression network analyses**

651 Network analysis was carried out in the larger dataset using circRNAs expressed in at least  
652 half of the CTX samples (DS1) using the blockwiseModules function in the WGCNA R package  
653 [63] with the following parameters: power =10, networkType = "signed", corFnc="bicor",  
654 minModuleSize=10, mergeCutHeight=0.15. The beta power was chosen so that the network  
655 fulfilled scale-free topology ( $r^2 > 0.8$ ). CircRNAs were assigned to a module based on their  
656 correlation to the module eigengene value ( $kME > 0.1$ ) and a significant BH-corrected p-value for  
657 this correlation (adjusted  $p < 0.05$ ). kME values are listed in Supplementary Table 5.

## 658 **RT-PCR validation of circRNAs**

659 22 circRNAs present in more than a third of the brain tissue samples were chosen for  
660 validation. RT-PCR was performed with divergent primers, on three independent RNA samples.  
661 RNA was extracted using a Qiagen miRNeasy kit, with on-column DNase digest. PCR  
662 amplification was carried out using BioRad iTaq Polymerase for 35 cycles, on an ABI ViiA7 cycler.  
663 Primer sequences for RT-PCR experiments are listed in Supplementary Table 8.

## 664 **Astrocyte and neuron circRNA dataset**

665 Mapping and circRNA quantification for RNA-seq data generated in the present study  
666 (cultured neurons and astrocytes), and data from brain organoids were carried out as described  
667 above for brain tissue data, with the difference that the RNA-seq data generated in this study is  
668 strand-specific, which was specified as a parameter in DCC. Gene-level expression data was  
669 filtered to include genes expressed at a minimum of 1 RPKM in at least 1 sample in each dataset.  
670 CircRNAs were included in the dataset if they were expressed at a minimum of 0.1 CPM in at least  
671 1 sample.

672 CircRNAs expressed in neurons and astrocytes in the brain organoid data were defined as  
673 circRNAs expressed at  $\geq 0.1$  CPM in at least two samples of the fully matured neuronal and  
674 astrocyte samples ( $> 150$  days) respectively. Neuron-specific and astrocyte-specific circRNAs were  
675 defined as circRNAs fulfilling the above criteria in one cell type but not the other.

676 **RBP binding site enrichment analysis**

677 DNA sequence corresponding to a window of 100 bp upstream and 100 bp downstream of  
678 the start and end coordinates of each circRNA was retrieved using the *fastaFromBed* function in  
679 BedTools [64]. For each set of circRNAs (i.e. astrocyte-specific and neuron-specific) both the start  
680 and end sequences were included in the RBP enrichment analysis. Local enrichment analysis was  
681 carried out using CENTRIMO, implemented in MEME-ChIP. MEME-ChIP was run on the online  
682 server (<http://meme-suite.org/tools/meme-chip>) with default parameters, using the “RNA, DNA  
683 encoded option”, and the RBP binding site data from Ray et al. 2013 [65], *Homo sapiens*. The  
684 analysis was limited to the strand corresponding to the provided sequence, as recommended for  
685 RNA data. The background set of sequences consisted of 100 bp windows around the start and end  
686 coordinates of 100,000 exons randomly selected from genes not forming circRNAs in the brain or  
687 in the organoid culture data.

688 **ACKNOWLEDGEMENTS** The authors would like to thank Dr. Cristopher Pardy and Dr. Jim  
689 Fang for technical support in the initial stages of the project. This work was supported by an  
690 NHMRC project grant and an ARC Future fellowship to IV.

691 **DATA AVAILABILITY** Sequencing data from this study is available in SRA [ID:TBD] before  
692 publication.

693 **AUTHOR CONTRIBUTIONS** IV conceived the study and supervised all aspects of the project.  
694 AG, FA, and IV analysed data, AG carried out experimental validations, AG and IV wrote the  
695 manuscript.

696 **COMPETING INTERESTS** The authors declare no competing financial interests.

697 **REFERENCES**

- 698 1. Chen, L.L., *The biogenesis and emerging roles of circular RNAs*. Nat Rev Mol Cell Biol, 2016. **17**(4):  
699 p. 205-11.
- 700 2. Salzman, J., et al., *Cell-type specific features of circular RNA expression*. PLoS Genet, 2013. **9**(9): p.  
701 e1003777.
- 702 3. Liang, D., et al., *The Output of Protein-Coding Genes Shifts to Circular RNAs When the Pre-mRNA*  
703 *Processing Machinery Is Limiting*. Mol Cell, 2017. **68**(5): p. 940-954 e3.
- 704 4. Pamudurti, N.R., et al., *Translation of CircRNAs*. Mol Cell, 2017. **66**(1): p. 9-21 e7.
- 705 5. Li, L., et al., *Comprehensive analysis of circRNA expression profiles in humans by RAISE*. Int J Oncol,  
706 2017. **51**(6): p. 1625-1638.

- 707 6. Rybak-Wolf, A., et al., *Circular RNAs in the Mammalian Brain Are Highly Abundant, Conserved, and*  
708 *Dynamically Expressed*. *Molecular cell*, 2015.
- 709 7. You, X., et al., *Neural circular RNAs are derived from synaptic genes and regulated by development*  
710 *and plasticity*. *Nature neuroscience*, 2015. **18**(4): p. 603-610.
- 711 8. Westholm, J.O., et al., *Genome-wide analysis of Drosophila circular RNAs reveals their structural*  
712 *and sequence properties and age-dependent neural accumulation*. *Cell reports*, 2014. **9**(5): p.  
713 1966-1980.
- 714 9. Zhang, Y., et al., *The biogenesis of nascent circular RNAs*. *Cell reports*, 2016. **15**(3): p. 611-624.
- 715 10. Szabo, L., et al., *Statistically based splicing detection reveals neural enrichment and tissue-specific*  
716 *induction of circular RNA during human fetal development*. *Genome Biol*, 2015. **16**: p. 126.
- 717 11. Hansen, T.B., et al., *Natural RNA circles function as efficient microRNA sponges*. *Nature*, 2013.  
718 **495**(7441): p. 384-388.
- 719 12. Piwecka, M., et al., *Loss of a mammalian circular RNA locus causes miRNA deregulation and affects*  
720 *brain function*. *Science*, 2017. **357**(6357).
- 721 13. Li, Z., et al., *Exon-intron circular RNAs regulate transcription in the nucleus*. *Nature structural &*  
722 *molecular biology*, 2015. **22**(3): p. 256-264.
- 723 14. Yu, C.Y., et al., *The circular RNA circBIRC6 participates in the molecular circuitry controlling*  
724 *human pluripotency*. *Nat Commun*, 2017. **8**(1): p. 1149.
- 725 15. Huang, R., et al., *Circular RNA HIPK2 regulates astrocyte activation via cooperation of autophagy*  
726 *and ER stress by targeting MIR124-2HG*. *Autophagy*, 2017. **13**(10): p. 1722-1741.
- 727 16. Chen, B.J., et al., *Characterization of circular RNAs landscape in multiple system atrophy brain*. *J*  
728 *Neurochem*, 2016. **139**(3): p. 485-496.
- 729 17. Song, X., et al., *Circular RNA profile in gliomas revealed by identification tool UROBORUS*. *Nucleic*  
730 *Acids Res*, 2016. **44**(9): p. e87.
- 731 18. Maass, P.G., et al., *A map of human circular RNAs in clinically relevant tissues*. *J Mol Med (Berl)*,  
732 2017. **95**(11): p. 1179-1189.
- 733 19. Xia, S., et al., *Comprehensive characterization of tissue-specific circular RNAs in the human and*  
734 *mouse genomes*. *Brief Bioinform*, 2017. **18**(6): p. 984-992.
- 735 20. Sekar, S., et al., *Circular RNA expression and regulatory network prediction in posterior cingulate*  
736 *astrocytes in elderly subjects*. *BMC genomics*, 2018. **19**(1): p. 340.
- 737 21. Liu, Y.C., et al., *Biclustering of transcriptome sequencing data reveals human tissue-specific*  
738 *circular RNAs*. *BMC Genomics*, 2018. **19**(Suppl 1): p. 958.
- 739 22. Sloan, S.A., et al., *Human Astrocyte Maturation Captured in 3D Cerebral Cortical Spheroids Derived*  
740 *from Pluripotent Stem Cells*. *Neuron*, 2017. **95**(4): p. 779-790 e6.
- 741 23. Parikshak, N.N., et al., *Genome-wide changes in lncRNA, splicing, and regional gene expression*  
742 *patterns in autism*. *Nature*, 2016. **540**(7633): p. 423-427.
- 743 24. Lonsdale, J., et al., *The Genotype-Tissue Expression (GTEx) project*. *Nature Genetics*, 2013. **45**: p.  
744 580.
- 745 25. Oldham, M.C., et al., *Functional organization of the transcriptome in human brain*. *Nat Neurosci*,  
746 2008. **11**(11): p. 1271-82.
- 747 26. Zhang, X.O., et al., *Complementary sequence-mediated exon circularization*. *Cell*, 2014. **159**(1): p.  
748 134-147.
- 749 27. Cheng, J., F. Metge, and C. Dieterich, *Specific identification and quantification of circular RNAs*  
750 *from sequencing data*. *Bioinformatics*, 2016. **32**(7): p. 1094-6.
- 751 28. Zeng, X., et al., *A comprehensive overview and evaluation of circular RNA detection tools*. *PLOS*  
752 *Computational Biology*, 2017. **13**(6): p. e1005420.
- 753 29. Hinrichs, A.S., et al., *The UCSC Genome Browser Database: update 2006*. *Nucleic Acids Res*, 2006.  
754 **34**(Database issue): p. D590-8.
- 755 30. Glazar, P., P. Papavasileiou, and N. Rajewsky, *circBase: a database for circular RNAs*. *RNA*, 2014.  
756 **20**(11): p. 1666-70.
- 757 31. Lambert, J.C., et al., *Meta-analysis of 74,046 individuals identifies 11 new susceptibility loci for*  
758 *Alzheimer's disease*. *Nat Genet*, 2013. **45**(12): p. 1452-8.
- 759 32. Li, Z., et al., *Genome-wide association analysis identifies 30 new susceptibility loci for*  
760 *schizophrenia*. *Nat Genet*, 2017. **49**(11): p. 1576-1583.
- 761 33. Schizophrenia Working Group of the Psychiatric Genomics, C., *Biological insights from 108*  
762 *schizophrenia-associated genetic loci*. *Nature*, 2014. **511**(7510): p. 421-7.

- 763 34. Han, Y., et al., *RIM determines Ca(2)+ channel density and vesicle docking at the presynaptic active*  
764 *zone*. *Neuron*, 2011. **69**(2): p. 304-16.
- 765 35. Veno, M.T., et al., *Spatio-temporal regulation of circular RNA expression during porcine embryonic*  
766 *brain development*. *Genome Biol*, 2015. **16**: p. 245.
- 767 36. Ashwal-Fluss, R., et al., *circRNA biogenesis competes with pre-mRNA splicing*. *Molecular cell*, 2014.  
768 **56**(1): p. 55-66.
- 769 37. Memczak, S., et al., *Circular RNAs are a large class of animal RNAs with regulatory potency*.  
770 *Nature*, 2013. **495**(7441): p. 333-338.
- 771 38. Salzman, J., et al., *Circular RNAs are the predominant transcript isoform from hundreds of human*  
772 *genes in diverse cell types*. *PloS one*, 2012. **7**(2): p. e30733.
- 773 39. Cortes-Lopez, M., et al., *Global accumulation of circRNAs during aging in Caenorhabditis elegans*.  
774 *BMC Genomics*, 2018. **19**(1): p. 8.
- 775 40. Shen, S., et al., *rMATS: robust and flexible detection of differential alternative splicing from*  
776 *replicate RNA-Seq data*. *Proc Natl Acad Sci U S A*, 2014. **111**(51): p. E5593-601.
- 777 41. Kim, H.G., et al., *Disruption of neurexin 1 associated with autism spectrum disorder*. *Am J Hum*  
778 *Genet*, 2008. **82**(1): p. 199-207.
- 779 42. Glessner, J., et al., *Autism genome-wide copy number variation reveals ubiquitin and neuronal*  
780 *genes*. *Nature*, 2009. **459**(7246): p. 569-573.
- 781 43. Voineagu, I., et al., *Transcriptomic analysis of autistic brain reveals convergent molecular*  
782 *pathology*. *Nature*, 2011. **474**(7351): p. 380-4.
- 783 44. Mercer, T.R., et al., *Specific expression of long noncoding RNAs in the mouse brain*. *Proceedings of*  
784 *the National Academy of Sciences*, 2008. **105**(2): p. 716.
- 785 45. Gong, T. and J.D. Szustakowski, *DeconRNASeq: a statistical framework for deconvolution of*  
786 *heterogeneous tissue samples based on mRNA-Seq data*. *Bioinformatics*, 2013. **29**(8): p. 1083-5.
- 787 46. Zhang, Y., et al., *Purification and Characterization of Progenitor and Mature Human Astrocytes*  
788 *Reveals Transcriptional and Functional Differences with Mouse*. *Neuron*, 2016. **89**(1): p. 37-53.
- 789 47. Colantuoni, C., et al., *Temporal dynamics and genetic control of transcription in the human*  
790 *prefrontal cortex*. *Nature*, 2011. **478**(7370): p. 519-23.
- 791 48. Kang, H.J., et al., *Spatio-temporal transcriptome of the human brain*. *Nature*, 2011. **478**(7370): p.  
792 483-9.
- 793 49. Jeck, W.R., et al., *Circular RNAs are abundant, conserved, and associated with ALU repeats*. *Rna*,  
794 2013. **19**(2): p. 141-157.
- 795 50. Ivanov, A., et al., *Analysis of intron sequences reveals hallmarks of circular RNA biogenesis in*  
796 *animals*. *Cell Rep*, 2015. **10**(2): p. 170-7.
- 797 51. Conn, S.J., et al., *The RNA binding protein Quaking regulates formation of circRNAs*. *Cell*, 2015.  
798 **160**(6): p. 1125-1134.
- 799 52. Machanick, P. and T.L. Bailey, *MEME-ChIP: motif analysis of large DNA datasets*. *Bioinformatics*,  
800 2011. **27**(12): p. 1696-7.
- 801 53. Langfelder, P. and S. Horvath, *Fast R Functions for Robust Correlations and Hierarchical*  
802 *Clustering*. *J Stat Softw*, 2012. **46**(11).
- 803 54. Chen, G., et al., *circHIPK3 regulates cell proliferation and migration by sponging miR-124 and*  
804 *regulating AQP3 expression in hepatocellular carcinoma*. *Cell Death Dis*, 2018. **9**(2): p. 175.
- 805 55. Yao, Z., et al., *ZKSCAN1 gene and its related circular RNA (circZKSCAN1) both inhibit*  
806 *hepatocellular carcinoma cell growth, migration, and invasion but through different signaling*  
807 *pathways*. *Mol Oncol*, 2017. **11**(4): p. 422-437.
- 808 56. Gao, Y., et al., *Comprehensive identification of internal structure and alternative splicing events in*  
809 *circular RNAs*. *Nat Commun*, 2016. **7**: p. 12060.
- 810 57. Gruner, H., et al., *CircRNA accumulation in the aging mouse brain*. *Sci Rep*, 2016. **6**: p. 38907.
- 811 58. Fogel, B.L., et al., *RBFox1 regulates both splicing and transcriptional networks in human neuronal*  
812 *development*. *Hum Mol Genet*, 2012. **21**(19): p. 4171-86.
- 813 59. Dobin, A., et al., *STAR: ultrafast universal RNA-seq aligner*. *Bioinformatics*, 2013. **29**(1): p. 15-21.
- 814 60. Young, M.D., et al., *Gene ontology analysis for RNA-seq: accounting for selection bias*. *Genome Biol*,  
815 2010. **11**(2): p. R14.
- 816 61. Takata, A., N. Matsumoto, and T. Kato, *Genome-wide identification of splicing QTLs in the human*  
817 *brain and their enrichment among schizophrenia-associated loci*. *Nat Commun*, 2017. **8**: p.  
818 14519.

- 819 62. Consortium, F., et al., *A promoter-level mammalian expression atlas*. Nature, 2014. **507**(7493): p.  
820 462-70.
- 821 63. Langfelder, P. and S. Horvath, *WGCNA: an R package for weighted correlation network analysis*.  
822 BMC Bioinformatics, 2008. **9**: p. 559.
- 823 64. Quinlan, A.R. and I.M. Hall, *BEDTools: a flexible suite of utilities for comparing genomic features*.  
824 Bioinformatics, 2010. **26**(6): p. 841-2.
- 825 65. Ray, D., et al., *A compendium of RNA-binding motifs for decoding gene regulation*. Nature, 2013.  
826 **499**(7457): p. 172-7.  
827

## 828 **FIGURE LEGENDS**

829 **Figure 1. Dataset Overview.** (A) Sample composition of dataset 1 (DS1) and dataset 2 (DS2).

830 *Left*: schematic representation of brain regions included in the study. FC - frontal cortex; TC -

831 temporal cortex; CB - cerebellum. *Right*: barplot displaying the number of samples included in

832 DS1 and DS2 categorised by brain region and phenotype (ASD and CTL). (B) Outline of data

833 analysis approach. *Top*: schematic representation of a gene expressing circRNA. Grey boxes -

834 exons; grey lines - introns; blue lines - linear junction reads; red lines - circular (i.e. backsplice)

835 junction reads. ULJ - upstream linear junction; DLJ - downstream linear junction. CJ - circular

836 junction. *Bottom*: data analysis pipeline. (C) Overlap between circRNAs detected in DS1 and DS2

837 as a function of filtering parameters. y-axis:

838 Overlap between DS1 and DS2 as a proportion of the smaller dataset (DS2); x-axis: number of

839 independent samples in which detection (by either 2 back-splice junction reads or 0.1 CPM) is

840 required. Based on these data, the chosen filtering parameter was 2 back-splice junction reads

841 detected in a minimum of 5 independent samples (\*).

842 **Figure 2. Dataset characterisation.** (A) Venn diagram displaying the overlap between DS1, DS2

843 and circBase. The numbers between brackets show the total number of circRNAs in each dataset,

844 after filtering for circRNAs expressed in a minimum of 5 samples in each dataset. (B) circRNA

845 PCR validation Top: schematic display of divergent primers (black arrows) around a circRNA

846 junction (dashed arc) which would amplify circRNAs, but not linear RNA molecules; negative

847 control divergent primers anneal to exons that do not circularise, within the same gene. Bottom:

848 Agarose gel electrophoresis of RT-PCR products using divergent primers around 22 selected

849 circRNA junctions. Each RT-PCR is carried out on 3 brain samples (S1-S3). All circRNAs

850 generate a PCR product at the expected size, except *circRMST*, and *circDCUNID4*, for which the  
851 product is not of the expected size. Additional bands at higher length are likely rolling circle  
852 amplification products. For a subset of circRNAs, RT-PCR was carried out with primers around the  
853 circRNA junction, and negative control primers, on a distinct sample (S4; bottom panel). **(C)** Gene  
854 ontology enrichment of circRNA producing genes. FDR - false discovery rate. The most  
855 biologically relevant enriched terms are displayed. A full list of enriched terms is provided in  
856 Supplementary Table 3. **(D)** Histogram displaying novel circRNAs expressed in more than 10  
857 samples. Left: DS1. Right: DS2. **(E)** Top: schematic display of seven highly expressed *RIMS2*  
858 circRNAs. Top track: hg19 chromosomal coordinates and a representative Ensembl transcript  
859 annotation of the region (due to space limit only one of multiple *RIMS2* transcripts annotated at  
860 this position is displayed). Each circRNA is displayed as a line spanning the interval between its  
861 start and end junctions. Red: Novel circRNAs. Black: circRNAs present in circBase. Bottom, left:  
862 Boxplots displaying circRNA expression differences between CTX and CB, in both DS1 and DS2.  
863 CI: circularisation index. Only five of the seven circRNAs are displayed, which showed significant  
864 differences in CI levels between CTX and CB after correction for covariates and multiple testing  
865 (Supplementary Table 7). Boxplots were generated using the boxplot function in R; the horizontal  
866 line represents the median, boxes extend between the first and third quartiles, and whiskers extend  
867 from the box to 1.5x the inter-quartile range. Bottom, right: Barplot showing the number of  
868 samples in which each circRNA was detected. circRNA labels correspond to the labels from the top  
869 annotations track.

870 **Figure 3. Major circRNA isoform expression.** **(A)** Histogram of the number of circRNA  
871 isoforms per gene (DS1). *Left*: all genes. *Right*: genes with more than 5 isoforms per gene (blow-  
872 out of the data in the left panel). **(B)** *Top*: schematic representation of a hypothetical gene  
873 expressing three circRNAs (circRNA1-3), of which circRNA1 has the highest expression level.  
874 Circular junction (CJ) reads are shown in red; linear junction reads are shown in blue. Circular-to-  
875 linear ratios (CLR) are calculated for each circRNA as shown in Figure 1. *Bottom*: Formulas for the



876 major isoform relative expression and major isoform relative CLR for the hypothetical example  
877 shown in the top schematic. **(C)** and **(D)** Boxplots showing the major isoform relative expression  
878 and major isoform relative CLR respectively. Red line displays the expected major isoform relative  
879 expression and CLR if all isoforms were equally expressed. Boxplots were generated using the  
880 boxplot function in R; the horizontal line represents the median, boxes extend between the first and  
881 third quartiles, and whiskers extend from the box to 1.5x the inter-quartile range.

882 **Figure 4. Interplay between circRNA expression and alternative splicing.** **(A)** The percent of  
883 alternatively spliced exons (Percent AS) is significantly higher among circ-forming exons (red line)  
884 than among non-circ forming exons (histogram displaying percent AS for 10,000 random  
885 samplings of non-circ forming exons with similar flanking intron length as circ-forming exons,  
886 sampled from genes with similar expression levels as circ-forming genes). P-values were calculated  
887 as the number of random sampling scores with more extreme values than the circ-exons score. Left:  
888 CTX, DS1; right: CB, DS1. **(B)** Density plots of exon inclusion level for circ-exons (red) and non-  
889 circ exons (blue) in CTX (left) and CB (right). **(C)** Scatterplot of the number of alternative splicing  
890 (AS) events per gene (y-axis) and the number of circRNAs expressed per gene (x-axis). Each data  
891 point represents a gene. Gene symbols are displayed for the genes discussed in text.

892 **Figure 5. CircRNA expression variability.** **(A)** Scatterplot showing the proportion of samples  
893 expressing a given circRNA at  $\geq 0.1$ CPM in DS1 (x-axis) and DS2 (y-axis). Each data point  
894 represents a circRNA. Only circRNAs detected in both datasets are included. rho: Spearman  
895 correlation coefficient. **(B)** Scatterplot showing the mean CLR in DS1 (x-axis) and DS2 (y-axis).  
896 Each data point represents a circRNA. Only circRNAs detected in both datasets are included. rho:  
897 Spearman correlation coefficient.

898 **Figure 6. circRNA expression in CTX and CB.** **(A)** Principal component plots of normalised  
899 circRNA expression (CLR) data. *Left:* DS1. *Right:* DS2. PC1, PC2 – first and second principal  
900 components. **(B)** Scatterplot of the circRNA expression difference between CB and CTX in DS1  
901 (x-axis) and DS2 (y-axis). **(C)** Scatterplot displaying the total number of circRNAs expressed in

902 each sample (y-axis; Methods) versus age (x-axis) in CB and CTX. Each data point represents a  
903 sample. Regression lines were generated using a loess smoothing function (`geom_smooth`) in  
904 `ggplot2`.

905 **Figure 7. CircRNA expression changes during cellular maturation in neurons and astrocytes.**

906 **(A)** The number of circRNAs expressed in astrocytes and neurons (y-axis) vs. the maturation time  
907 point in organoid cultures (x-axis). **(B)** Top two enriched RBP motifs for neuron-specific circRNAs.

908 **Figure 8. Co-expression networks identify circRNA expression changes in ASD. (A)** Module

909 eigengene values for M4 show significant differences between ASD and control CTX samples.

910  $p=0.006$ , Wilcoxon rank-sum test, Bonferroni corrected. Boxplots were generated using the `boxplot`

911 function in R; the horizontal line represents the median, boxes extend between the first and

912 third quartiles, and whiskers extend to 1.5 IQR (inter-quartile range) from the box. Notches

913 mark  $\pm 1.58 \text{ IQR}/\sqrt{n}$ , where  $n$  represents the number of data points. **(B)** Network plot of M4,

914 showing the top 20 circRNAs by kME (blue circles), and the top 50 connections between them as

915 edges.

916

## 917 SUPPLEMENTARY FIGURES

918 **Supplementary Figure 1. Characterisation of DS1 and DS2 sample composition. (A)** DS1. **(B)**

919 DS2.  $p$ : Wilcoxon rank-sum test  $p$ -values for age, and Fisher test  $p$ -values for gender ratios.

920 Boxplots were generated using the `boxplot` function in R; the horizontal line represents the median,

921 boxes extend between the first and third quartiles, and whiskers extend to 1.5 IQR (inter-quartile

922 range) from the box. Notches mark  $\pm 1.58 \text{ IQR}/\sqrt{n}$ , where  $n$  represents the number of data

923 points.

924 **Supplementary Figure 2. Benchmarking of circRNA expression data. (A)** Barplots of false

925 positive rates defined as the % of circRNAs detected in each DS1 sample that were also detected in

926 polyA+ data from the same sample, normalized for the sequencing depth. **(B)** Barplots of

927 sequencing depth (millions of uniquely mapped reads) for DS1 libraries, as well as RNA-seq data

928 generated in the present study (polyA+ and RD\_stranded). RD: ribo-depleted. **(C)** Barplots of the  
929 number of circRNAs detected in polyA+ libraries (i.e. false-positives) for DS1 data, ribo-depleted  
930 stranded data, as well as those common between both types of data. RD: ribo-depleted. Left: DCC,  
931 Right: CIRCexplorer. **(D)** Scatterplots of normalized circRNA expression levels (CPM: counts per  
932 million) quantified by DCC and CIRCexplorer.  $r$  : Pearson correlation coefficient. **(E)** CircRNA  
933 detection using DCC across various expression thresholds. Number of circRNAs detected by using  
934 a threshold of either 2 back-splice junction reads (left), or 0.1 CPM (right), in a minimum of 1 to 10  
935 independent samples.

936 **Supplementary Figure 3. CircRNA annotation relative to genomic features.** exonJ-exonJ:  
937 circRNAs for which both ends correspond to annotated exon junctions. The rest of circRNAs were  
938 annotated based on the overlap of at least one end with genomic features, using the following  
939 hierarchy: exonJ > exonic > intronic > intergenic.

940 **Supplementary Figure 4. Comparison of circRNA expression and linear gene expression in**  
941 **CTL samples. (A) and (B).** Scatterplots for DS1 **(A)** and DS2 **(B)** displaying circular junction  
942 expression vs. the expression of the corresponding linear junctions, quantified as the maximum of  
943 the upstream and downstream junctions (left panel), circular junction expression vs. parental gene  
944 expression (centre), and linear junction expression for circRNA-forming junctions vs. parental gene  
945 expression (right panel) **(C).** Boxplots displaying the mean expression of circRNA-genes and non-  
946 circRNA forming genes in DS1 (left) and DS2 (right). Boxplots were generated using the boxplot  
947 function in R; the horizontal line represents the median, boxes extend between the first and  
948 third quartiles, and whiskers extend to 1.5 IQR (inter-quartile range) from the box. Notches  
949 mark  $\pm 1.58 \text{ IQR}/\sqrt{n}$ , where  $n$  represents the number of data points.

950 **Supplementary Figure 5. Intron-pairing rank of circRNA major isoforms.** Genes are classified  
951 based on how many circRNAs they express, and for each class (X-axis), the intron pairing rank of  
952 the major isoform is plotted in % (Y-axis). Rank=1: highest intron pairing score; Rank=10: lowest  
953 intron pairing score. Only genes expressing up to 10 circRNAs are plotted.

954 **Supplementary Figure 6. CircRNA expression variability. (A)** Scatterplots of mean expression  
955 (x-axis) and standard deviation (y-axis). Left: genes, centre: splice junctions, right: circRNAs. CV:  
956 mean coefficient of variation. **(B)** Histograms displaying the number of samples in which genes  
957 (left), splice junctions (centre), and circRNAs (right) were expressed.

958 **Supplementary Figure 7. Estimated proportion of neurons in DS1 and DS2. (A)** Boxplots  
959 displaying the estimated proportion of neurons across brain regions and phenotypes, in DS1 (left)  
960 and DS2 (right). Boxplots were generated using the `geom_boxplot` and `geom_violin` functions in R;  
961 the horizontal line represents the median, boxes extend between the first and third quartiles, and  
962 whiskers extend to 1.5 IQR (inter-quartile range) from the box. Notches mark  $\pm 1.58 \text{ IQR}/\sqrt{n}$ ,  
963 where  $n$  represents the number of data points. **(B)** Scatterplots of first principal component values  
964 of gene expression data (PC1, y-axis) vs. estimated proportion of neurons. **(C)** Scatterplots of first  
965 principal component values of circRNA expression data (PC1, y-axis) vs. estimated proportion of  
966 neurons. All neuronal proportion estimates are based on reference transcriptome data from Zhang  
967 et al. 2016.

968 **Supplementary Figure 8. Assessment of cellular composition estimates. (A)** Scatterplot of  
969 estimated neuronal proportions based on the FANTOM5 and Zhang et al. reference transcriptome  
970 data in DS1 and DS2;  $\rho$ : Spearman correlation coefficient. **(B)** Scatterplot of gene expression  
971 levels of two neuronal-specific genes (*RBFOX1*-top row, and *MAP2*-bottom row; y-axis) vs.  
972 estimated neuronal proportions (x-axis).  $\rho$ : Spearman correlation coefficient.

973

## 974 SUPPLEMENTARY TABLES

975 **Supplementary Table 1.** Sample description (DS1 and DS2) and summary of mapping results for  
976 all RNA-seq data included in this study.

977 **Supplementary Table 2.** CircRNA annotation and expression data. A. DS1 circRNA annotation. B.  
978 DS2 circRNA annotation. C. DS1 circRNA expression (CPM). D. DS2 circRNA expression  
979 (CPM)

980 **Supplementary Table 3.** Gene Ontology enrichment of circRNA-producing genes.

981 **Supplementary Table 4.** MEME-ChIP results

982 **Supplementary Table 5.** WGCNA circRNA results. kME: correlation between individual  
983 circRNA expression and module eigengene values. pvalBH: Student p-values for the kME  
984 correlation values, corrected for multiple testing using a Benjamini and Hochberg correction.

985 **Supplementary Table 6.** CircRNA expression during astrocyte and neuronal maturation.  
986 Expression values are in CPM. Sample names include SRA id, day of the maturation, time point  
987 and either “Hepa” for the astrocyte immunopanned samples or “Thy-1” for neuronal  
988 immunopanned samples.

989 **Supplementary Table 7.** Brain region-specific circRNAs

990 **Supplementary Table 8.** Primer sequences for RT-PCR validation of circRNAs.

991

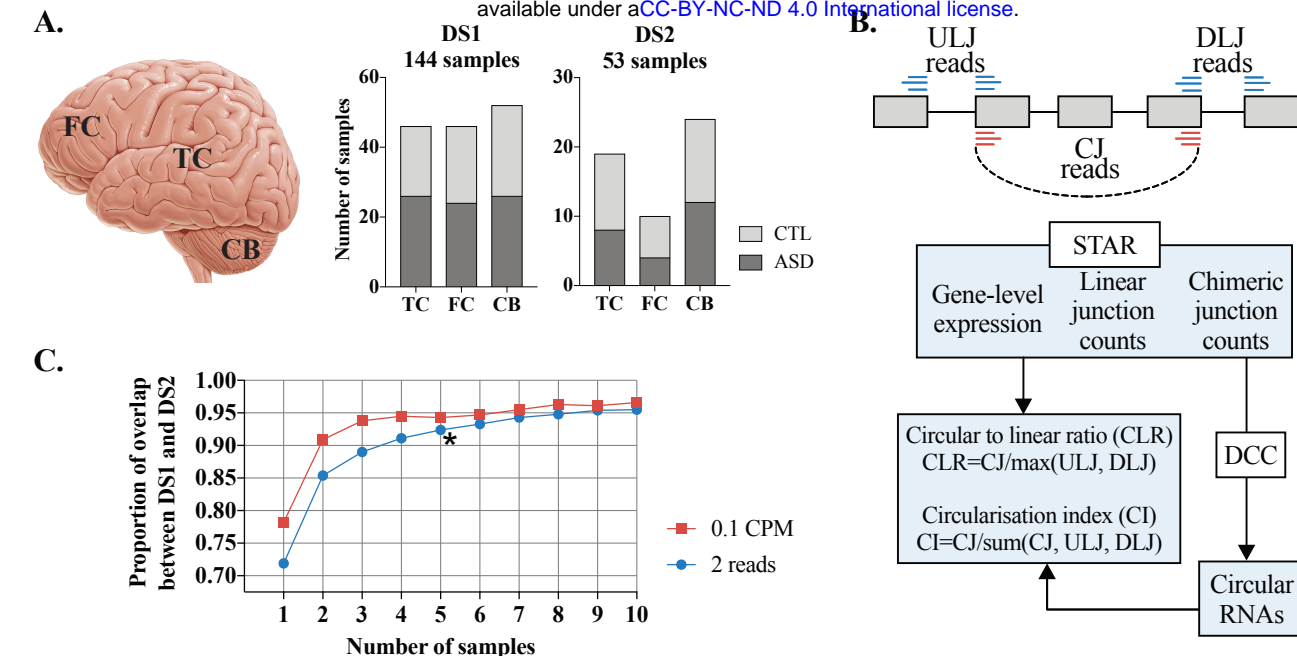

**Figure 1. Dataset Overview.** (A) Sample composition of dataset 1 (DS1) and dataset 2 (DS2). *Left:* schematic representation of brain regions included in the study. FC - frontal cortex; TC - temporal cortex; CB - cerebellum. *Right:* barplot displaying the number of samples included in DS1 and DS2 categorised by brain region and phenotype (ASD and CTL). (B) Outline of data analysis approach. *Top:* schematic representation of a gene expressing circRNA. Grey boxes - exons; grey lines - introns; blue lines - linear junction reads; red lines - circular (i.e. backsplice) junction reads. ULJ - upstream linear junction; DLJ - downstream linear junction. CJ - circular junction. *Bottom:* data analysis pipeline. (C) Overlap between circRNAs detected in DS1 and DS2 as a function of filtering parameters. y-axis: Overlap between DS1 and DS2 as a proportion of the smaller dataset (DS2); x-axis: number of independent samples in which detection (by either 2 back-splice junction reads or 0.1 CPM) is required. Based on these data, the chosen filtering parameter was 2 back-splice junction reads detected in a minimum of 5 independent samples (\*).

## FIGURE 2

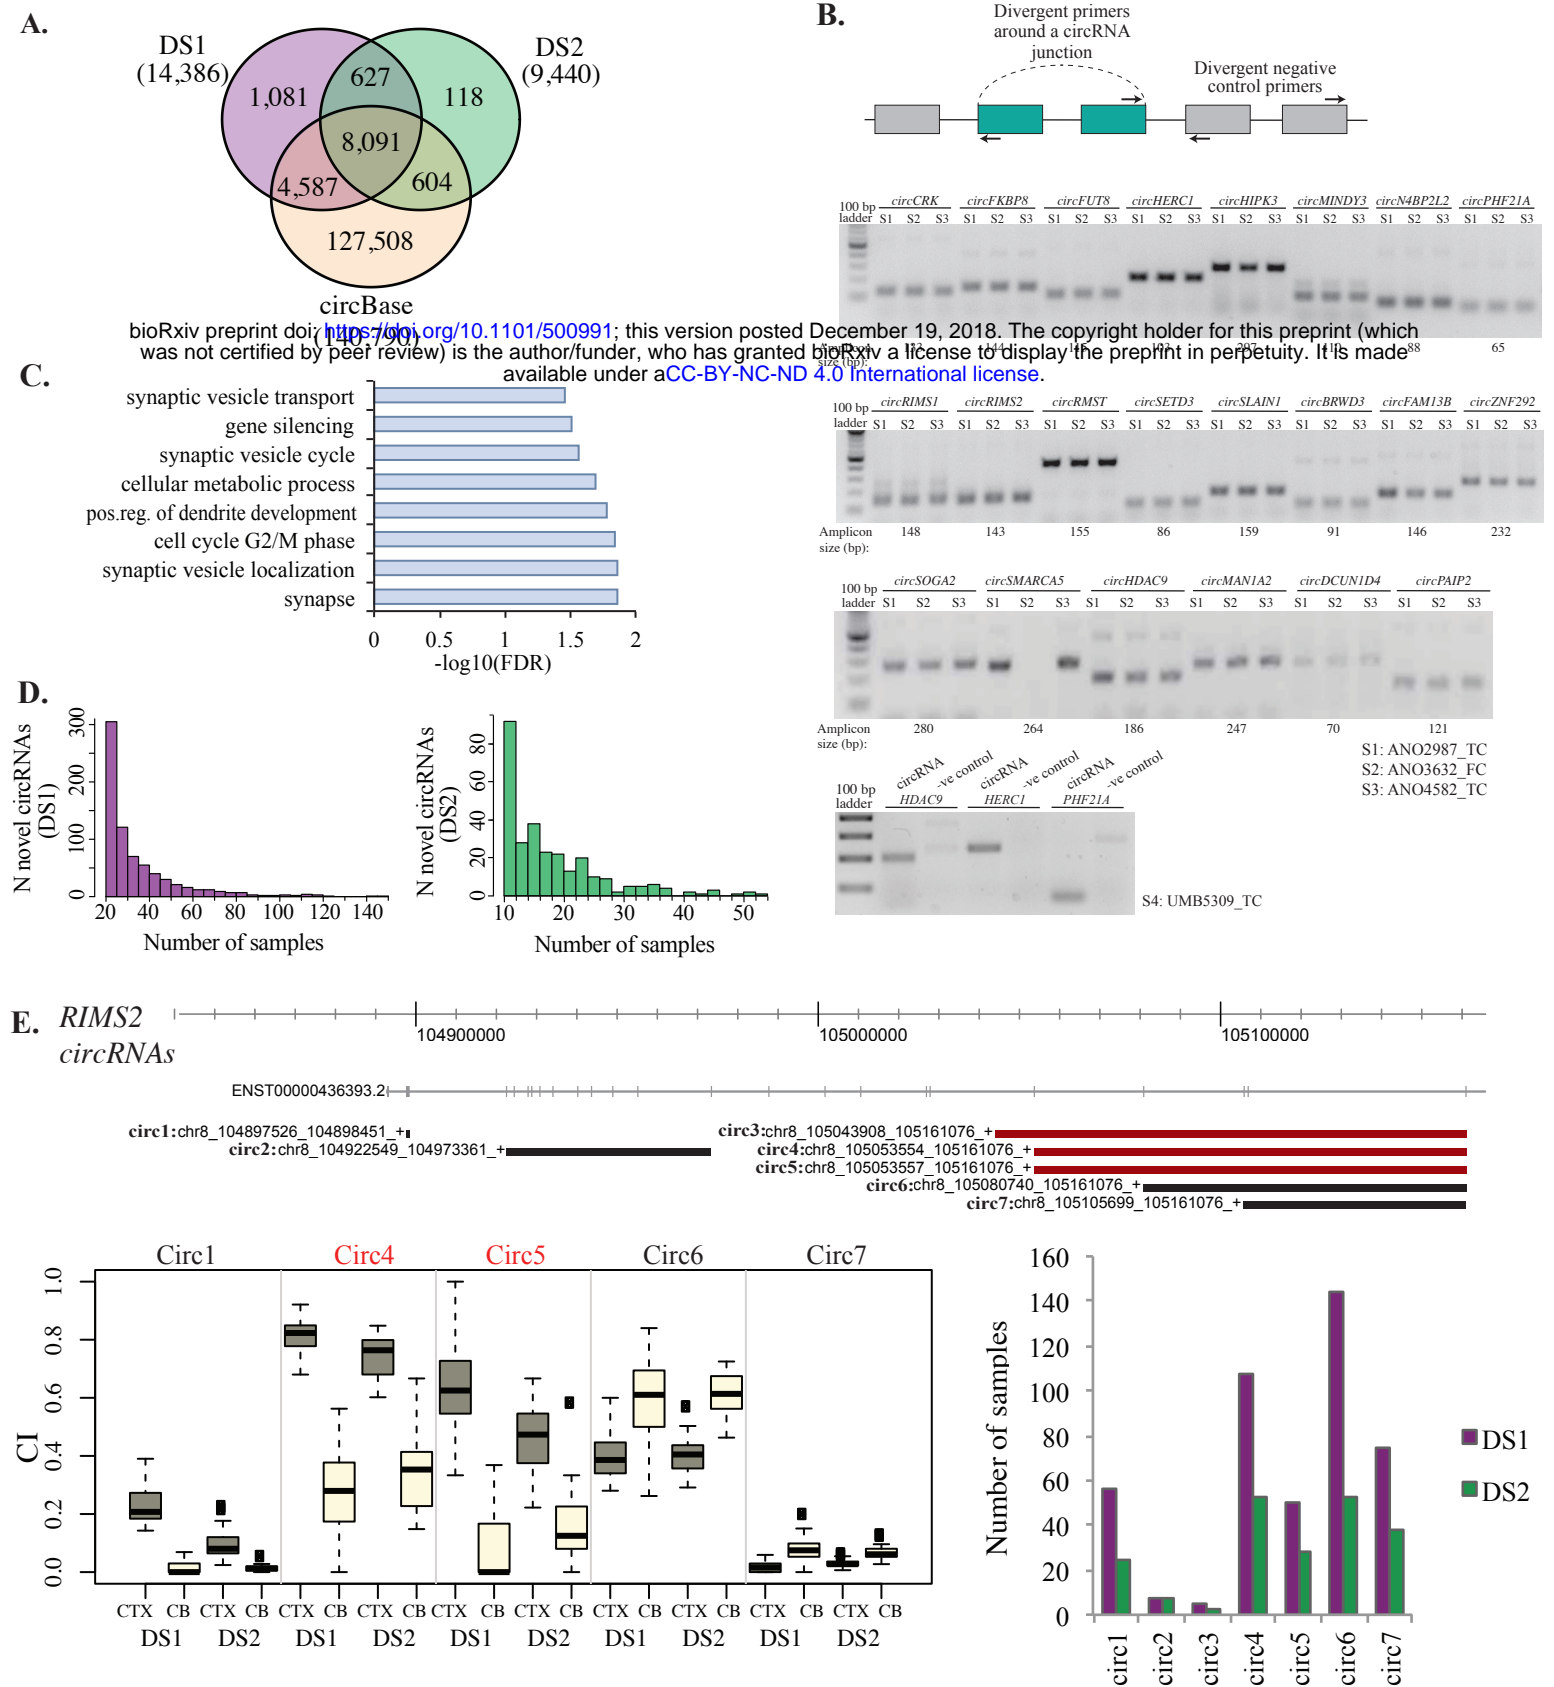

**Figure 2. Dataset characterisation.** (A) Venn diagram displaying the overlap between DS1, DS2 and circBase. The numbers between brackets show the total number of circRNAs in each dataset, after filtering for circRNAs expressed in a minimum of 5 samples in each dataset. (B) circRNA PCR validation. *Top*: schematic display of divergent primers (black arrows) around a circRNA junction (dashed arc) which would amplify circRNAs, but not linear RNA molecules; negative control divergent primers anneal to exons that do not circularise, within the same gene. *Bottom*: Agarose gel electrophoresis of RT-PCR products using divergent primers around 22 selected circRNA junctions. Each RT-PCR is carried out on 3 brain samples (S1-S3). All circRNAs generate a PCR product at the expected size, except circRMST, and circDCUN1D4, for which the product is not of the expected size. Additional bands at higher length are likely rolling circle amplification products. For a subset of circRNAs, RT-PCR was carried out with primers around the circRNA junction, and negative control primers, on a distinct sample (S4; bottom panel). (C) Gene ontology enrichment of circRNA producing genes. FDR - false discovery rate. The most biologically relevant enriched terms are displayed. A full list of enriched terms is provided in Supplementary Table 3. (D) Histogram displaying novel circRNAs expressed in more than 10 samples. Left: DS1. Right: DS2. (E) *Top*: schematic display of seven highly expressed *RIMS2* circRNAs. Top track: hg19 chromosomal coordinates and a representative Ensembl transcript annotation of the region (due to space limit only one of multiple *RIMS2* transcripts annotated at this position is displayed). Each circRNA is displayed as a line spanning the interval between its start and end junctions. Red: Novel circRNAs. Black: circRNAs present in circBase. *Bottom, left*: Boxplots displaying circRNA expression differences between CTX and CB, in both DS1 and DS2. CI: circularisation index. Only five of the seven circRNAs are displayed, which showed significant differences in CI levels between CTX and CB after correction for covariates and multiple testing (Supplementary Table 7). Boxplots were generated using the boxplot function in R; the horizontal line represents the median, boxes extend between the first and third quartiles, and whiskers extend from the box to 1.5x the inter-quartile range. *Bottom, right*: Barplot showing the number of samples in which each circRNA was detected. circRNA labels correspond to the labels from the top annotations track.

**A.**

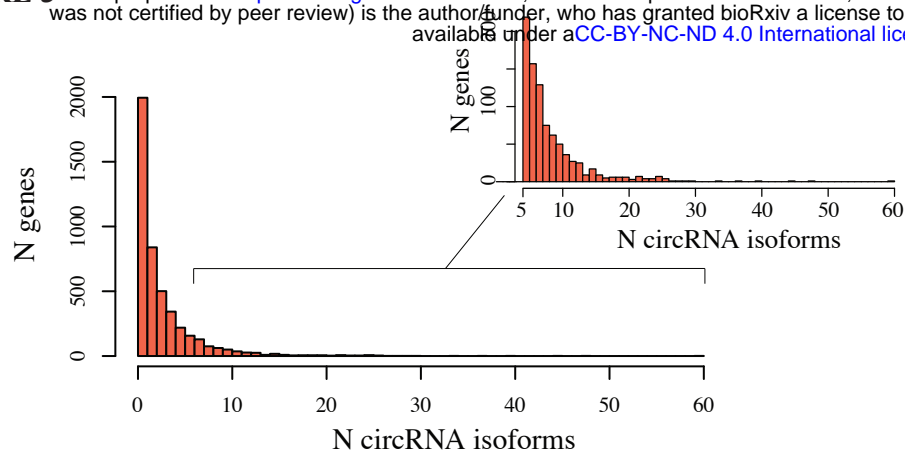

**B.**

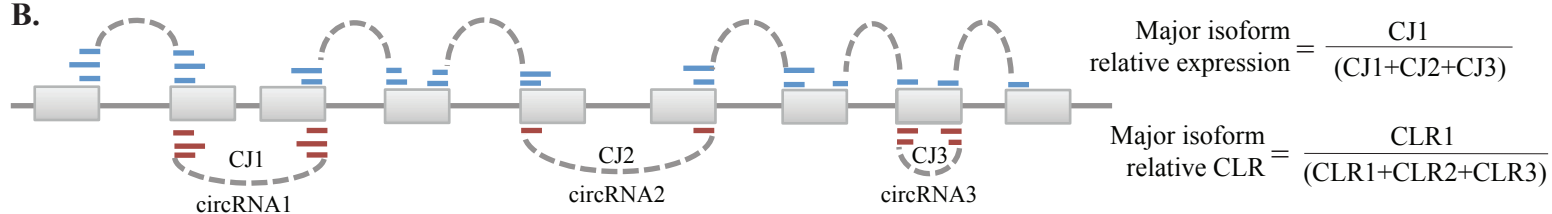

**C.**

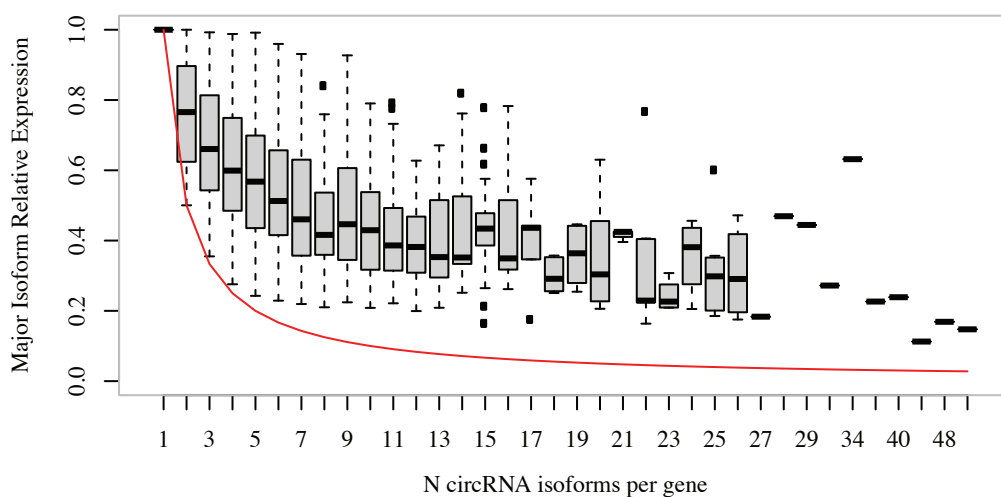

**D.**

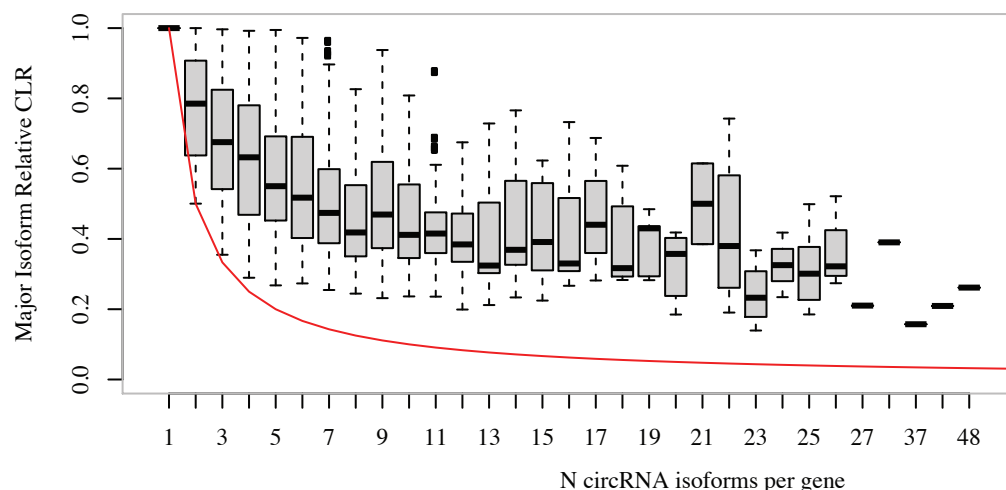

**Figure 3. Major circRNA isoform expression.** (A) Histogram of the number of circRNA isoforms per gene (DS1). *Left*: all genes. *Right*: genes with more than 5 isoforms per gene (blow-out of the data in the left panel). (B) *Top*: schematic representation of a hypothetical gene expressing three circRNAs (circRNA1-3), of which circRNA1 has the highest expression level. Circular junction (CJ) reads are shown in red; linear junction reads are shown in blue. Circular-to-linear ratios (CLR) are calculated for each circRNA as shown in Figure 1. *Bottom*: Formulas for the major isoform relative expression and major isoform relative CLR for the hypothetical example shown in the top schematic. (C) and (D) Boxplots showing the major isoform relative expression and major isoform relative CLR respectively. Red line displays the expected major isoform relative expression and CLR if all isoforms were equally expressed. Boxplots were generated using the boxplot function in R; the horizontal line represents the median, boxes extend between the first and third quartiles, and whiskers extend from the box to 1.5x the inter-quartile range.



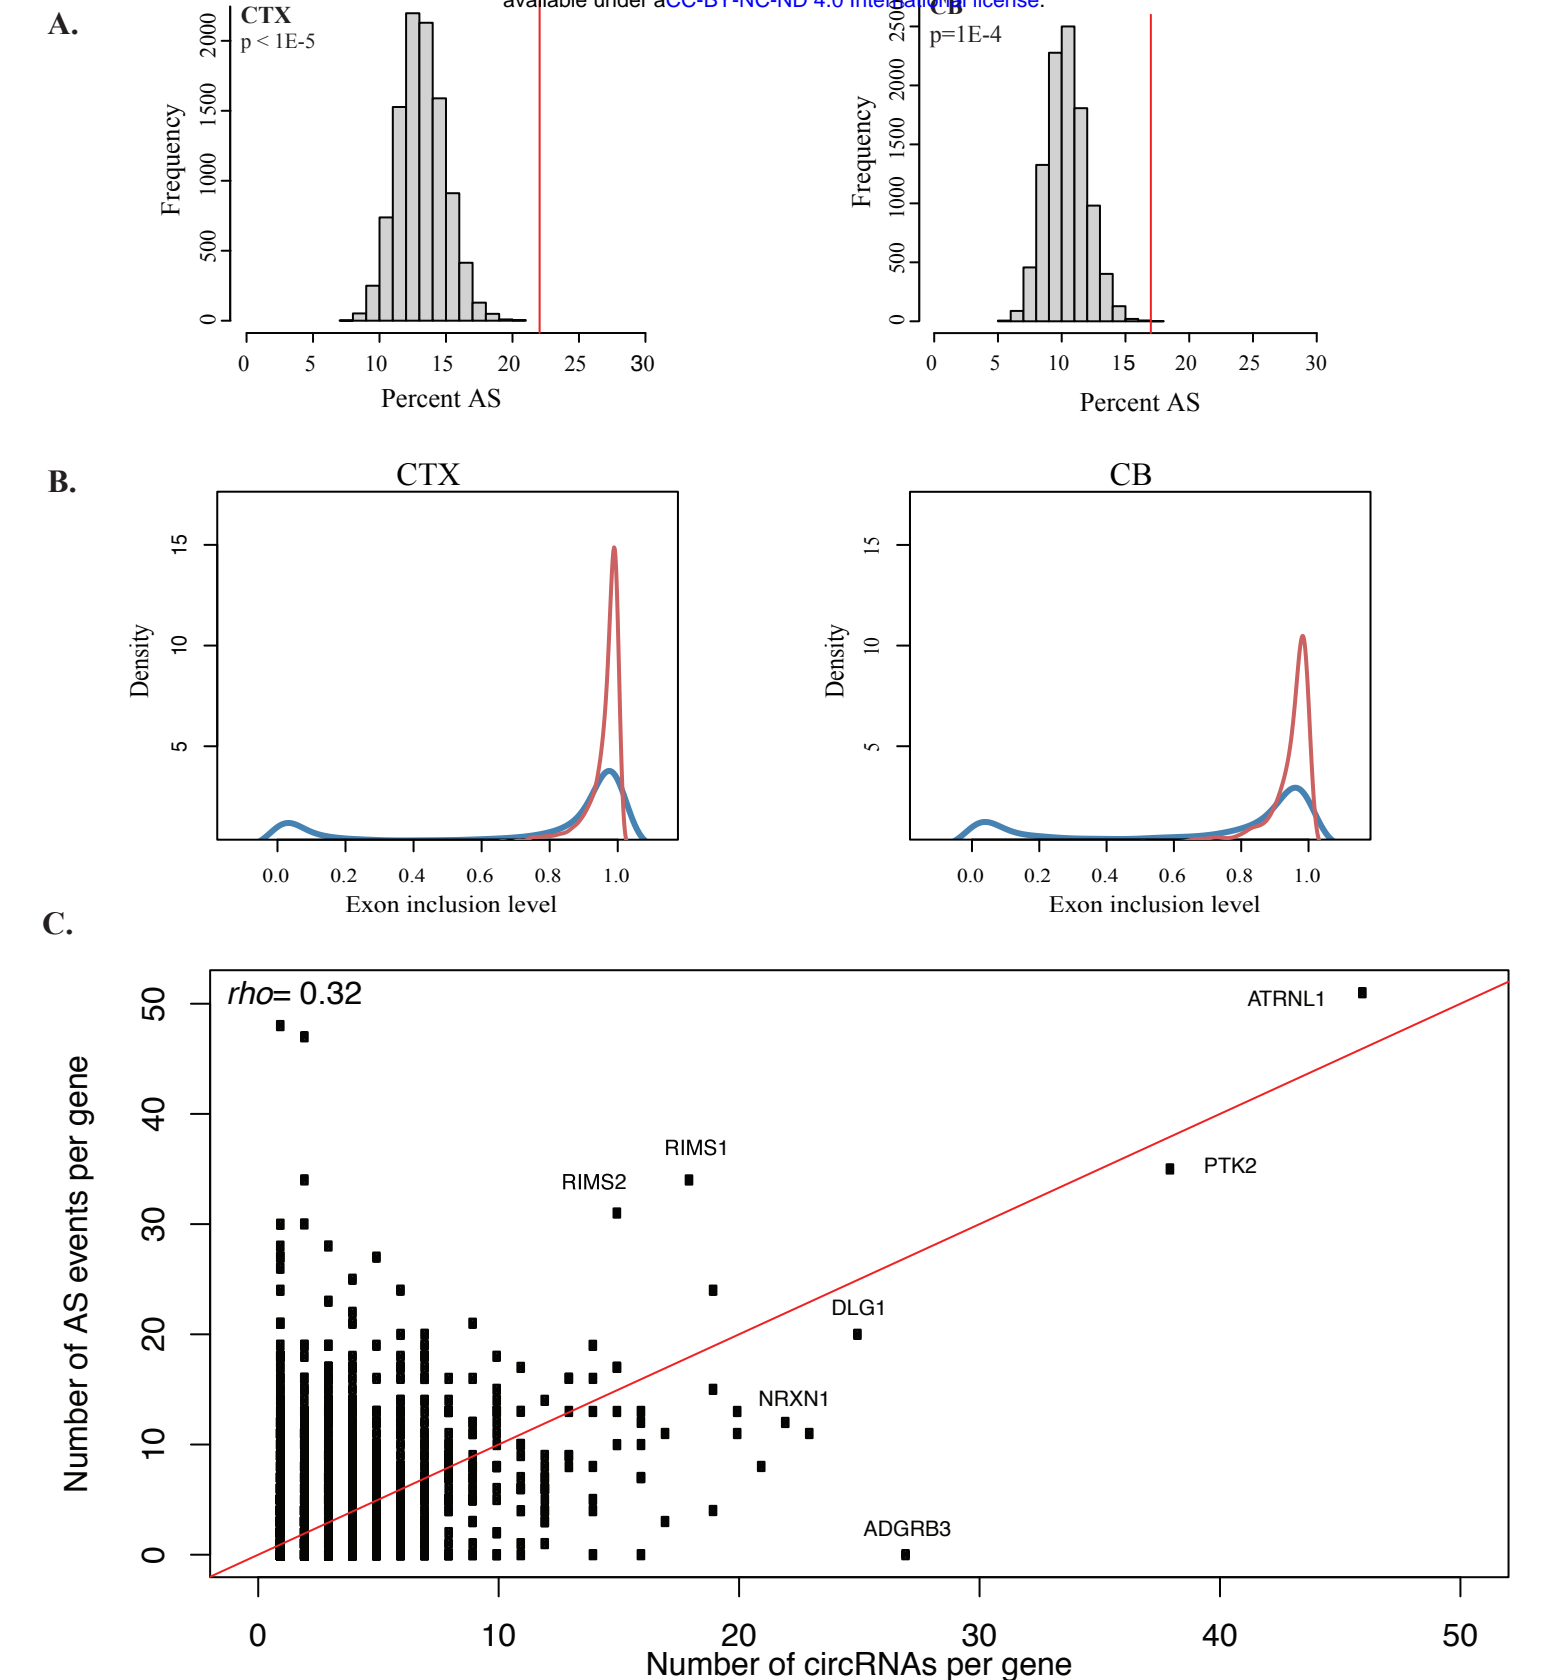

**Figure 4. Interplay between circRNA expression and alternative splicing.**

(A) The percent of alternatively spliced exons (Percent AS) is significantly higher among circ-forming exons (red line) than among non-circ forming exons (histogram displaying percent AS for 10,000 random samplings of non-circ forming exons with similar flanking intron length as circ-forming exons, sampled from genes with similar expression levels as circ-forming genes). p-values were calculated as the number of random sampling scores with more extreme values than the circ-exons score. Left: CTX, DS1; right: CB, DS1. (B) Density plots of exon inclusion level for circ-exons (red) and non-circ exons (blue) in CTX (left) and CB (right). (C) Scatterplot of the number of alternative splicing (AS) events per gene (y-axis) and the number of circRNAs expressed per gene (x-axis), for circRNA hotspots (i.e.  $\geq 5$  circRNAs per gene). Each data point represents a gene. Gene symbols are displayed for the genes discussed in text.

A.

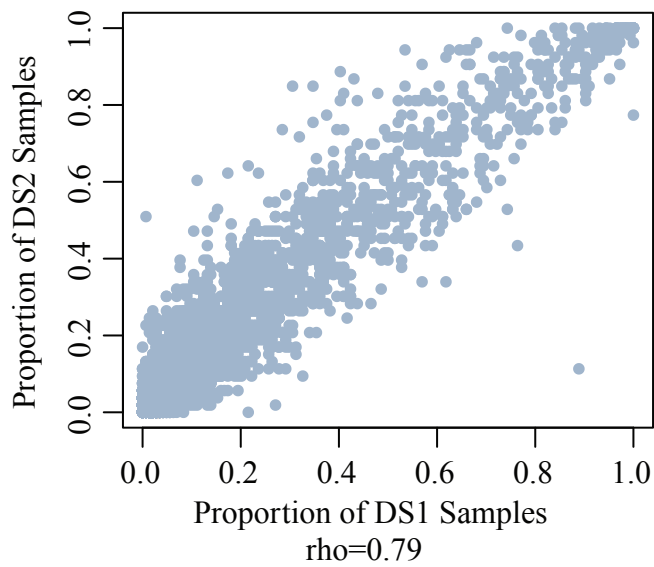

B.

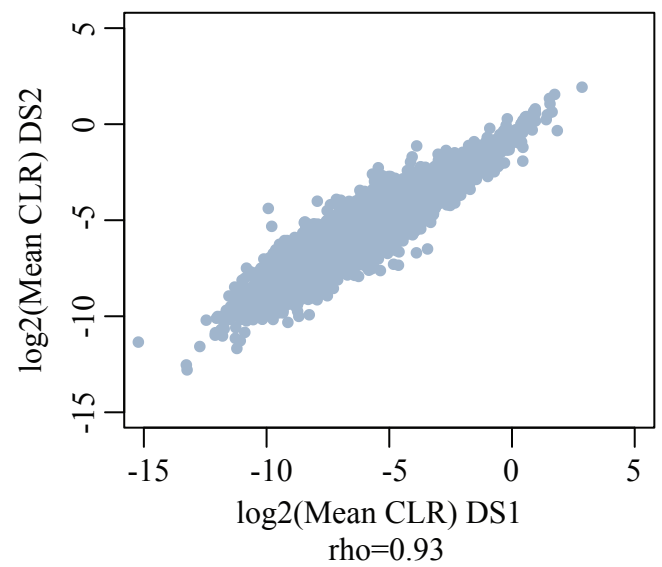

**Figure 5. CircRNA expression variability.** (A) Scatterplot showing the proportion of samples expressing a given circRNA at  $\geq 0.1$ CPM in DS1 (x-axis) and DS2 (y-axis). Each data point represents a circRNA. Only circRNAs detected in both datasets are included.  $\rho$ : Spearman correlation coefficient. (B) Scatterplot showing the mean CLR in DS1 (x-axis) and DS2 (y-axis). Each data point represents a circRNA. Only circRNAs detected in both datasets are included.  $\rho$ : Spearman correlation coefficient.

A.

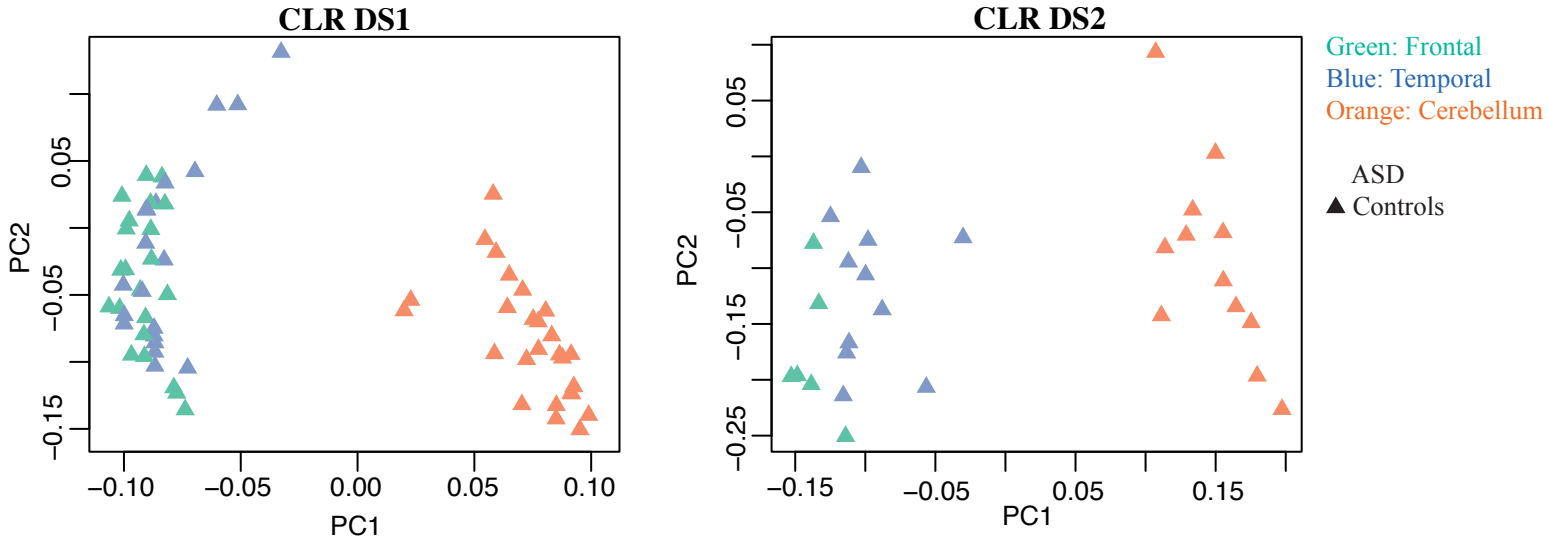

B.

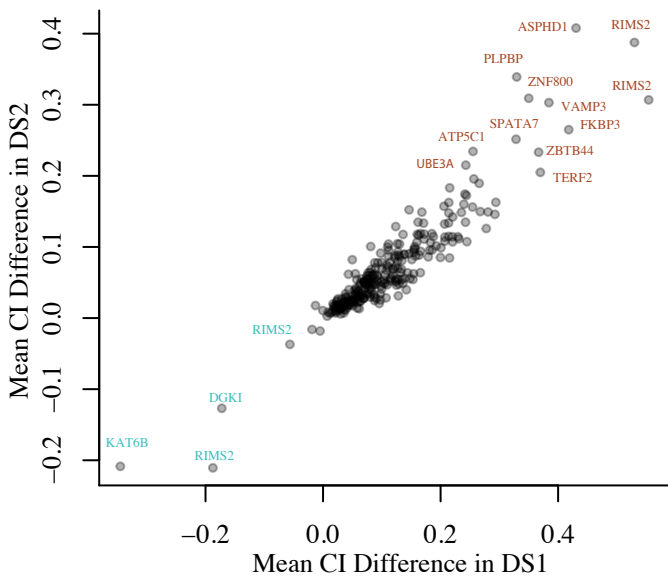

C.

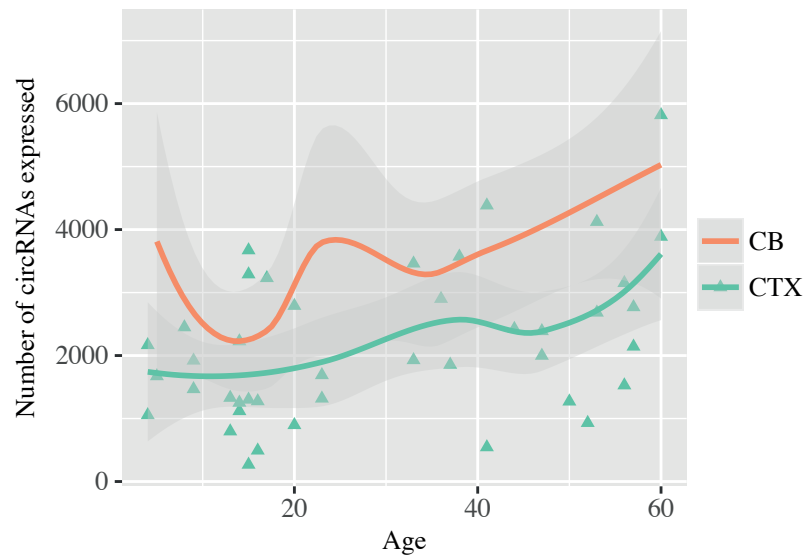

**Figure 6. CircRNA expression in CTX and CB.** (A) Principal component plots of normalised circRNA expression (CLR) data. *Left:* DS1. *Right:* DS2. PC1, PC2 – first and second principal components. (B) Scatterplot of the circRNA expression difference between CB and CTX in DS1 (x-axis) and DS2 (y-axis). (C) Scatterplot displaying the total number of circRNAs expressed in each sample (y-axis; Methods) versus age (x-axis) in CB and CTX. Each data point represents a sample. Regression lines were generated using a loess smoothing function (geom\_smooth) in ggplot2.

A.

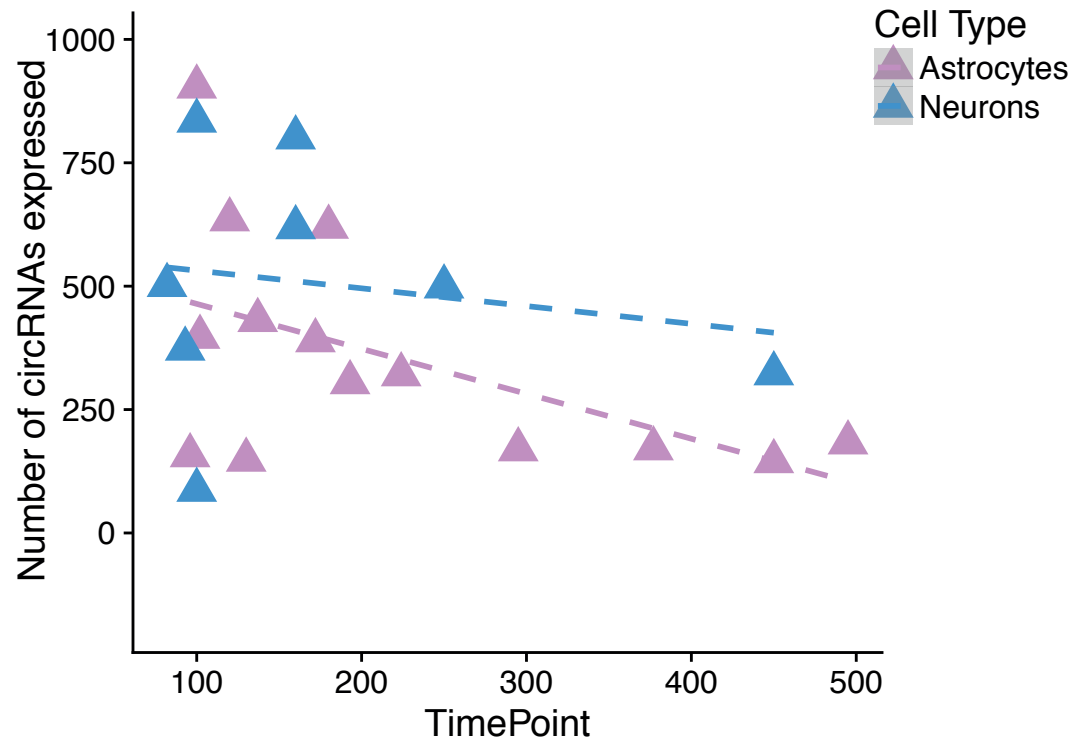

B.

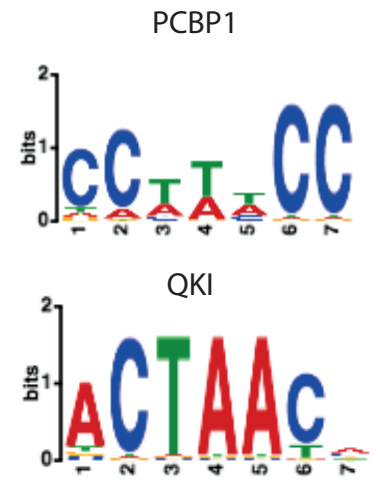

**Figure 7. CircRNA expression changes during cellular maturation in neurons and astrocytes. (A)** The number of circRNAs expressed in astrocytes and neurons (y-axis) vs. the maturation time-point in organoid cultures (x-axis). **(B)** Top two enriched RBP motifs for neuron-specific circRNAs.

A.

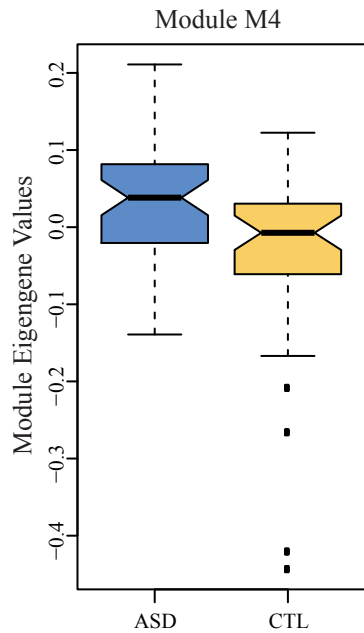

B.

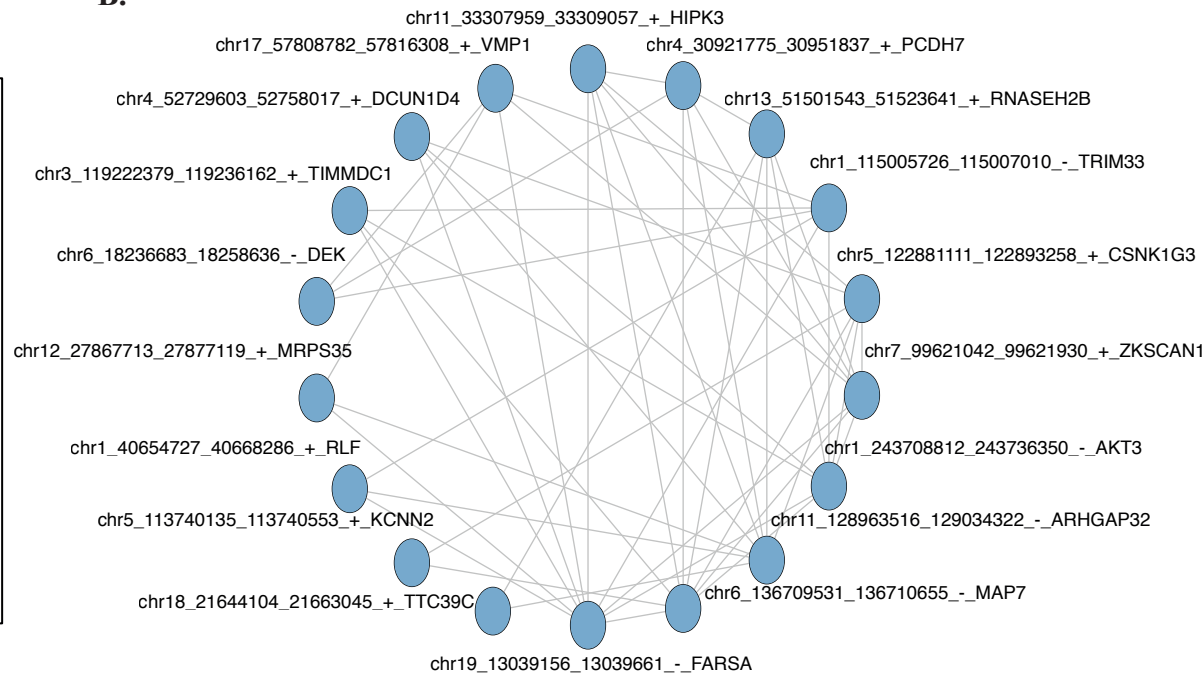

**Figure 8. Co-expression networks identify circRNA expression changes in ASD.** (A) Module eigengene values for M4 show significant differences between ASD and control CTL samples.  $p=0.006$ , Wilcoxon rank-sum test, Bonferroni corrected. Boxplots were generated using the boxplot function in R; the horizontal line represents the median, boxes extend between the first and third quartiles, and whiskers extend to 1.5 IQR (inter-quartile range) from the box. Notches mark  $\pm 1.58 \text{ IQR}/\sqrt{n}$ , where  $n$  represents the number of data points. (B) Network plot of M4, showing the top 20 circRNAs by kME (blue circles), and the top 50 connections between them as edges.
